1 **Transcriptome and metabolome analysis provide insights into root and root released**  
2 **organic anion responses to phosphorus deficiency in oat**

3  
4 Yanliang Wang<sup>1</sup>, Erik Lysøe<sup>1\*</sup>, Tegan Armarego-Marriott<sup>2</sup>, Alexander Erban<sup>2</sup>, Lisa Paruch<sup>1</sup>,  
5 Andre van Eerde<sup>1</sup>, Ralph Bock<sup>2</sup> and Jihong Liu-Clarke<sup>1\*</sup>

6  
7 1. Division of Biotechnology and Plant Health, Norwegian Institute of Bioeconomy Research,  
8 Ås, Norway  
9 2. Max-Planck-Institute of Molecular Plant Physiology, Am Mühlenberg 1, D-14476 Potsdam-  
10 Golm, Germany

11  
12 Email address of each author: Y.W., [Yanliang.wang@nibio.no](mailto:Yanliang.wang@nibio.no); T.A.M., [Armarego@mpimp-](mailto:Armarego@mpimp-golm.mpg.de)  
13 [golm.mpg.de](mailto:golm.mpg.de) ; A.E., [erban@mpimp-golm.mpg.de](mailto:erban@mpimp-golm.mpg.de); L.P., [lisa.paruch@nibio.no](mailto:lisa.paruch@nibio.no); A.V.E.,  
14 [Andre.vanEerde@nibio.no](mailto:Andre.vanEerde@nibio.no); R.B., [RBock@mpimp-golm.mpg.de](mailto:RBock@mpimp-golm.mpg.de)

15  
16 \*Corresponding authors:

17 Research Professor Jihong Liu Clarke

18 Tel: +47 995 94 790 Email: [Jihong.liu-clarke@nibio.no](mailto:Jihong.liu-clarke@nibio.no)

19 Researcher Erik Lysøe

20 Tel: +47 99713274 Email: [erik.lysoe@nibio.no](mailto:erik.lysoe@nibio.no)

21  
22 Total words: 5401 (Introduction: 1035 words; Materials and Methods: 1477 words; Results:  
23 1210 words; Discussion: 1540 words; Acknowledgements: 139 words)

24 Total figures: 7 (Fig.4 and Fig.5 should be published in colour) Total tables: 4

25 Supporting information: 4 figures + 6 tables

26 **Running title:** Root transcriptome and metabolome responses to low-P in oat

27 **Highlight**

28 We found oat- a monocot food crop, showed high exudation rate of citrate under phosphorus  
29 deficiency; root transcriptome and metabolome were then investigated to understand oat  
30 adaptation to P deficiency.

31 **Abstract**

32 Root and root-released organic anions play important roles in uptake of phosphorus (P), an  
33 essential macronutrient for food production. Oat, ranking sixth in the world's cereal production,  
34 contains valuable nutritional compounds and can withstand poor soil conditions. The aim of this  
35 research was to investigate root transcriptional and metabolic responses of oat grown under P-  
36 deficient and P-sufficient conditions. We conducted a hydroponic experiment and measured root  
37 morphology, organic anions exudation, and analysed changes in the transcriptome and  
38 metabolome, to understand oat root adaptation to P deficiency. We found that oat roots showed  
39 enhanced citrate and malate exudation after four weeks of P-deficiency. After 10 days of P-  
40 deficiency, we identified 9371 differentially expressed transcripts with a two-fold or greater  
41 change ( $p < 0.05$ ): forty-eight sequences predicted to be involved in organic anion biosynthesis  
42 and efflux were consistently up-regulated; twenty-four up-regulated transcripts in oat were also  
43 found up-regulated upon P starvation in rice and wheat under similar conditions. Phosphorylated  
44 metabolites (i.e. glucose-6-phosphate, myo-inositol-phosphate) reduced dramatically, while  
45 citrate and malate, some sugars and amino acids increased slightly in P-deficient oat roots. Our  
46 data provide new insights into the root responses to P deficiency and root-released organic anions  
47 in oat.

48 **Keywords:** metabolome, oat (*Avena sativa* L.), organic anions, phosphorus deficiency, plant  
49 roots, RNA-seq

## 50 **Introduction**

51 Oat, *Avena sativa* L., is one of the most important food and feed crops in the world. It contains  
52 various nutritional and health-promoting compounds such as avenanthramides, tocopherols  
53 (vitamin E), and digestive fibre ( $\beta$ -glucans) (Gutierrez-Gonzalez *et al.*, 2013; Gutierrez-Gonzalez  
54 & Garvin, 2016), which may help reduce blood pressure and blood sugar levels, reduce  
55 cholesterol, and promote healthy gut bacteria (Alminger and Eklund-Jonsson, 2008; Nazare *et al.*,  
56 2009; Valeur *et al.*, 2016; Whitehead *et al.*, 2014). In addition, oat can withstand poor soil  
57 conditions (e.g. acidic soils; Hill 1931; Stewart and McDougall, 2014) and is widely cultivated in  
58 temperate climates.

59 The world population is estimated to reach 9.8 billion by 2050 ([www.un.org](http://www.un.org)). In order to feed  
60 the world, we need to secure sustainable food production worldwide. Phosphorus (P) is a key  
61 macronutrient with significant impact on plant growth and productivity. The application of  
62 millions of tons of P fertilizers every year exhausts the limited and non-renewable P stocks  
63 available in the world (Cordell *et al.*, 2009). Hence, an understanding of the mechanisms of P  
64 mobilization and uptake in order to improve P acquisition efficiency, particularly in staple cereal  
65 food crops, is of importance for food security, and for environmentally friendly and sustainable  
66 food production in the future (Cordell *et al.*, 2009; Faucon *et al.*, 2015; Vance *et al.*, 2003).

67 Plants have evolved various adaptive strategies to cope with P deficiency in nature.  
68 Examples are morphological responses such as changes in root architecture (Hermans *et al.*, 2006;  
69 Lynch, 2011); physiological adaptations like secreted organic anions and acid phosphatases  
70 (Cheng *et al.*, 2014; Gahoonia *et al.*, 2000; Hedley *et al.*, 1982; Hoffland *et al.*, 1989; Jones 1998;  
71 Lambers *et al.*, 2006; Pang *et al.*, 2015; Ryan *et al.*, 2001; Wang *et al.*, 2016), biochemical  
72 responses to optimize utilization of internal P such as replacement of P-lipids with non-P lipids  
73 (Chiou & Lin, 2011; Faucon *et al.*, 2015; Lambers *et al.*, 2015; Plaxton & Tran, 2011;), and  
74 molecular responses like induced expression of high-affinity phosphate transporters (Wu *et al.*,  
75 2013; Zhang *et al.*, 2014). In addition, for plant species that are capable of interacting with  
76 mycorrhizal fungi, P uptake by the mycorrhizal hyphae is the dominant pathway for P acquisition  
77 (Smith *et al.*, 2003; Sawers *et al.*, 2017).

78 Multiple genes and different mechanisms are required to improve plant tolerance to P  
79 deficiency. Thousands of plant genes that are differentially expressed in response to P deficiency

80 have been identified by microarray, expressed sequence tags (EST) analysis and RNA sequencing  
81 (RNA-seq) in a large variety of plant species such as *Arabidopsis* (*Arabidopsis thaliana*), potato  
82 (*Solanum tuberosum*), rice (*Oryza sativa*), wheat (*Triticum aestivum*), and white lupin (*Lupinus*  
83 *albus*) (Hammond *et al.*, 2011; Misson *et al.*, 2005; Oono *et al.*, 2011; O'Rourke *et al.*, 2013;  
84 Oono *et al.*, 2013). Regulatory components identified include transcription factors (TFs such as  
85 PHR1), SPX domain-containing proteins, plant hormones, microRNAs, protein modifiers and  
86 epigenetic modifications (Chiou & Lin, 2011; Lin *et al.*, 2009; Panigrahy *et al.*, 2009; Wu *et al.*,  
87 2013; Yang & Finnegan, 2010; Zhang *et al.*, 2014). The networks of regulatory genes that are  
88 necessary to sense and respond to P deficiency are complex and differ in different plant species.  
89 For Poaceae species, the molecular mechanisms associated with P uptake, translocation and  
90 remobilization are well elucidated in rice (Panigrahy *et al.*, 2009; Oono *et al.*, 2013; Wu *et al.*,  
91 2013). Briefly, P starvation activates expression of OsPHR2, which triggers gene expression of  
92 phosphate transporters, purple acid phosphatase (PAP) and other proteins contributing to  
93 enhanced P uptake. In addition, SPX domain-containing proteins, which are activated by  
94 expression of OsPHR2, support maintenance and utilization of internal phosphate. OsPHO1  
95 functions in P translocation (xylem loading) while SIZ1 (a small ubiquitin like modifier SUMO  
96 E3 ligase) targets PHR2 and acts both negatively and positively on various P deficiency  
97 responses. Finally, microRNA399 targets PHO2 to regulate plant P homeostasis (Chiou and Lin,  
98 2011; Oono *et al.*, 2013; Panigrahy *et al.*, 2009; Wu *et al.*, 2013).

99 Plant root plays an essential role in P uptake. It is well known that to promote P uptake at  
100 reduced P availability, most species allocate more biomass to roots, increase root length and  
101 develop more and longer root hairs and later roots and so on (Hermans *et al.*, 2006; Lambers *et*  
102 *al.*, 2006; Lambers *et al.*, 2015; Lynch, 2011). Accordingly, mechanisms regulating root  
103 architecture like phytohormones and particularly the auxin responses under P limitation have  
104 been elucidated, as well as genes associated with those responses (see reviews Chiou and Lin,  
105 2011; Lin *et al.*, 2009; Lynch, 2011; Panigrahy *et al.*, 2009). Root exuded organic anions is also  
106 considered as an important mechanism to mobilize soil less-available P and enhance plant P  
107 uptake, while there is little information on the molecular mechanisms involved in organic acids  
108 biosynthesis and efflux under P deficiency.

109 Despite the importance of oats, limited research has been carried out on its adaptation to P  
110 starvation, and particularly the molecular regulation of root and root-released organic anions in

111 response to P deficiency. In a previous report, we found that oat showed an increased root mass /  
112 total biomass ratio, high percentage of root colonization by arbuscular mycorrhizal fungi (AMF),  
113 large amounts of rhizosphere organic anions and efficient P uptake in low P availability soils  
114 (Wang *et al.*, 2016). These findings paved the way for our current study on the molecular  
115 mechanisms underlying P deficiency responses in oat roots and the genes and metabolites  
116 involved. Here, we compared gene expression and metabolome profiles of oat roots exposed to P  
117 sufficiency (100  $\mu\text{M}$   $\text{KH}_2\text{PO}_4$ ) and deficiency (1  $\mu\text{M}$   $\text{KH}_2\text{PO}_4$ ) conditions by hydroponic culture.  
118 The objectives were: 1) identification of differentially expressed transcripts in oat roots in  
119 response to P deficiency, with particular focus on up-regulated transcripts associated with organic  
120 anions biosynthesis and exudation; 2) discovery of conserved responsive genes in rice, wheat and  
121 oat, and transcripts unique for oat; 3) assessment of differential metabolite accumulation in  
122 response to P deficiency and the transcriptional program triggered by it. The overall goal of the  
123 current study was to identify candidate genes that will enrich our understanding of oat adaptation  
124 to P deficiency and that may be useful to future breeding and genetic engineering efforts towards  
125 oat improvement.

## 126 **Materials and Methods**

### 127 **Plant growth and harvest**

128 Seeds of the oat cultivar 'BELINDA' were germinated and grown hydroponically in full strength  
129 nutrient media (Wang *et al.*, 2015) in the greenhouse at the Norwegian University of Life  
130 Sciences. Fourteen days after sowing, seedlings were transferred to the same medium  
131 supplemented with 100 (P100) or 1 (P1)  $\mu\text{M}$   $\text{KH}_2\text{PO}_4$ , respectively, and pH adjusted to  $5.8 \pm 0.2$ .  
132 Plants were grown under a photoperiod of 16 h light and 8 h dark at a light intensity of  $200 \pm 20$   
133  $\mu\text{mol m}^{-2} \text{s}^{-1}$  and 50-75% relative humidity, with a temperature of 25 °C/ 16 °C (day/ night). The  
134 nutrient solution was replaced every third day.

135 Ten days post-treatment, four root samples (representing four independent biological  
136 replications) from both P100 and P1 treated plants were collected for RNA extraction and  
137 analysis as described by Oono *et al.* (2011). The sampled roots were mixed samples containing  
138 the root cap zone, elongation zone and a part of the maturation zone. Those eight root samples,  
139 together with another eight samples (four from P1 and four from P100) were used for root  
140 metabolome analysis. When sampled roots for RNA and metabolite extraction, the roots were

141 quickly washed and water-removed and then immediately placed in liquid nitrogen. Additionally,  
142 eight plants (two treatments, four replicates) were used for studies of root morphology, root  
143 organic anions and biomass determinations after four weeks of different P treatments. All the  
144 plants were in vegetative growth phase, with tiller but before heading.

#### 145 **Root released organic anions, root morphology and biomass determination**

146 For root exudate collection, briefly, whole root systems of intact plants were carefully washed  
147 with deionized water to remove the nutrient solution. The whole root system was then placed into  
148 ultrapure Milli-Q water (Millipore, Billerica, MA, USA) in a container to collect root exudates  
149 (Khorassani *et al.*, 2011; Wang *et al.*, 2015). Afterwards, micropur (0.01 g L<sup>-1</sup>, Katadyn Products,  
150 Kempthal, Switzerland) was added to the solution to inhibit the activity of microorganisms  
151 (Cheng *et al.*, 2014). The collected root exudates were analysed by liquid chromatography triple  
152 quadrupole mass spectrometry (LC–MS/MS), as described in a previous study (Wang *et al.* 2015).  
153 Root released organic anions were collected and analysed after plants had been grown  
154 hydroponically under P1 or P100 for 2 weeks and 4 weeks, respectively.

155 After 4 weeks, the total number of green leaves and senesced leaves was recorded. For root  
156 morphology determination, WinRHIZO (EPSON 1680, WinRHIZO Pro2003b, Regent  
157 Instruments Inc., Quebec, Canada) was used to measure root length, number of lateral roots and  
158 root surface area. Shoot and root dry weight (DW) were measured separately after being oven-  
159 dried for 48 h at 65 °C. Shoot P concentrations were subsequently determined by inductively  
160 coupled plasma atomic emission spectroscopy (Wang *et al.*, 2015).

#### 161 **RNA extraction and quality control**

162 Total RNA was extracted using a Spectrum™ Plant Total RNA Kit (Sigma-Aldrich, St. Louis,  
163 MO, USA) and genomic DNA was removed using On-column DNase I digest kit (Sigma-Aldrich,  
164 St. Louis, MO, USA). RNA quantity and quality was assessed by a NanoDrop spectrophotometer  
165 (NanoDrop Technologies, Wilmington, DE, USA) and Agilent 2100 Bioanalyzer (Santa Clara,  
166 CA, USA). RNA samples with RIN (RNA integrity number) scores greater than 9.0 were used  
167 for RNA-Seq. Eight independent root cDNA libraries were prepared according to Illumina's  
168 TruSeq® RNA Sample Preparation v2 Guide and 125-bp paired-end reads were sequenced using  
169 an Illumina HiSeq 2500 sequencer (Illumina, San Diego, CA, USA) at the Norwegian  
170 Sequencing Centre ([www.sequencing.uio.no](http://www.sequencing.uio.no)).

## 171 **Sequence processing and analysis**

172 A total of 215,087,481 paired-end short read sequences were quality checked, trimmed and *de*  
173 *novo* assembled using CLC Genomics Workbench v9.01 (QIAGEN Aarhus, Denmark),  
174 generating 207017 contigs, with a maximum contig length of 13,319 nt, a minimum contig length  
175 of 200 nt and a mean contig length of 801 nt (Table 1). Gene expression was calculated and  
176 normalized using RPKM (Reads Per kb per Million reads). Differential expression between P1  
177 and P100 was analyzed by *t*-tests and up-/down- regulation of genes was considered to be  
178 significant if equal or greater than two-fold ( $p < 0.05$ ). Totally, 41,679 transcripts were filtered  
179 out and selected to be *de novo* Oat Root Transcriptome (*dnORT*), used as a reference for further  
180 analysis. The *dnORT* sequences were a combination of the differentially expressed transcripts,  
181 and other transcripts with RPKM  $\geq 1.5$  regardless of P treatments. These sequences were  
182 annotated using Blast2Go (Conesa *et al.*, 2005) and MapMan (Thimm *et al.*, 2004). RNA  
183 sequencing raw data were deposited to the GeneBank Sequence Read Archive (SRA) database  
184 under bioproject identifier PRJNA355647.

## 185 **Real-time quantitative reverse transcription PCR (qRT-PCR) analysis**

186 First-strand cDNA was synthesized from 1.0  $\mu$ g RNA using iScript<sup>TM</sup> Adv cDNA kit for qRT-  
187 PCR (Bio-Rad, USA). The qRT-PCR reactions were carried out on CFX96<sup>TM</sup> Real-time system  
188 (Bio-Rad, USA) using SsoAdvanced<sup>TM</sup> Universal SYBR<sup>®</sup> Green Supermix (Bio-Rad, USA) with  
189 transcript-specific primers shown in Supporting Information Table S5. Ten ng cDNA were used  
190 as template in a 20  $\mu$ l qPCR reaction consisting of 0.8  $\mu$ M primers. After initial denaturing at  
191 95°C for 5 min, the reaction was followed by 40 cycles at 95°C for 15 s, 61°C for 15 s and 72°C  
192 for 45 s. The expression of endogenous reference genes *EF1 $\alpha$*  (Elongation factor 1 $\alpha$ , Kemen *et*  
193 *al.*, 2014) and  *$\beta$ -Actin* was used to normalize the expression level estimated by the  $\Delta\Delta$ Cq method  
194 provided by CFX Manager 3.1 (Bio-Rad, USA). Four biological replicates of each treatment and  
195 three technical replicates of each sample were applied in the analysis. The qPCR data were  
196 represented as fold change (P1 mean value: P100 mean value) derived from relative normalized  
197 expression level from four biological replicates and further compared with RNA-seq results (P1  
198 RPKM means/ P100 RPKM means). *R* software (version 3.2.2) and one-way ANOVA were used  
199 to examine significant differences between P1 and P100 treatments. Heat maps were generated in  
200 Heml 1.0: Heatmap illustrator as described by Deng *et al.* (2014).

## 201 **Root metabolite extraction**

202 Eight replicate samples each of roots from plants grown under P1 and P100 conditions were  
203 sampled. Frozen samples (with water content varying between 95.3% and 96.6%) of 100 mg ( $\pm$   
204 10%) root were ground to homogeneity (2 min, 30 Hz; Grinding Mill MM310; Retsch, DE) under  
205 frozen conditions. To each sample was added 360  $\mu$ L precooled ( $-20$  °C) extraction buffer (300 $\mu$ L  
206 methanol, 30  $\mu$ L 2 mg mL<sup>-1</sup> nonadecanoic acid methylester in chloroform, 30  $\mu$ L 0.2 mg mL<sup>-1</sup>  
207 13-C sorbitol in methanol) and samples shaken for 15 min, 70 °C, 1000 rpm (Thermomixer  
208 Comfort Eppendorf, DE). Samples were cooled to room temperature, added to 200  $\mu$ L CHCl<sub>3</sub>  
209 and further shaken for 5 min, 37 °C, 1000 rpm. To each sample was added 400  $\mu$ L H<sub>2</sub>O and,  
210 following vortexing, samples were centrifuged (5 min, 14000 rpm) to facilitate phase separation.  
211 Finally, 160  $\mu$ L of the upper, polar phase was aliquoted and dried overnight by Speed Vac.

## 212 **Gas chromatography–mass spectrometry (GC-MS) metabolite profiling and identification**

213 Prior to gas chromatography–electron impact–time of flight mass spectrometry (GC-EI/TOF-MS)  
214 analysis, metabolites were methoxyaminated and trimethylsilylated. Briefly, addition of 40  $\mu$ l  
215 MeOX (40 mg mL<sup>-1</sup> methoxyaminhydrochloride in pyridine), samples were shaken (1.5 h, 30 °C),  
216 addition of 80  $\mu$ l BSTFA mixture (70  $\mu$ l N, O-Bis(trimethylsilyl)trifluoroacetamide +10  $\mu$ l  
217 Alkane-Mix (n-alkanes: C10, C12, C15, C18, C19, C22, C28, C32, and C36)), and further shaken  
218 (30 min, 37 °C). GC-MS was undertaken using an Aligent CP9013 column in an Agilent  
219 6890N24 gas chromatograph, coupled to a Pegasus III, similar to that previously described  
220 (Dethloff *et al.*, 2014; Erban *et al.*, 2007; Wagner *et al.*, 2003). Measurements were undertaken  
221 both splitless and split (1/30) from an injection volume of 1  $\mu$ L, with bulk metabolites reaching  
222 the upper detection limit in split-less measurements evaluated from split data. Retention indices  
223 were calibrated based on added n-alkanes (Strehmel *et al.*, 2008).

224 Chromatograms were visually controlled, baseline corrected and exported in NetCDF format  
225 using ChromaTOF. Further data processing and compound identification was performed with  
226 TagFinder (Luedemann *et al.*, 2008) and by matching to the Golm Metabolome Database (GMD,  
227 <http://gmd.mpimpgolm.mpg.de/>; Kopka *et al.*, 2005; Schauer *et al.*, 2005), and the NIST08  
228 database (<http://www.nist.gov/srd/mslist.htm>). Manually supervised metabolite annotation and  
229 quantification was undertaken with the requirement of at least three specific quantitative mass  
230 fragments per compound, and a retention index deviation < 1.0 %. Data were normalized to



231 sample fresh weight, the internal 13-C6 sorbitol, and represented relative to the mean value of  
232 P100 samples per analyte.

### 233 **Principal component analysis (PCA) and statistical analysis**

234 PCA was carried out by using the program *R*. Data were normalized to the median of the P100  
235 samples and subsequently subjected to logarithmic (Log2) transformation. Missing values were  
236 not substituted with zero or a constant value. Statistical testing was performed using the *t* test in  
237 multiple experiment viewer MeV (Saeed *et al.*, 2006), based on Log2 transformed data, followed  
238 by Mann-Whitney false discovery rate (FDR) correction at  $\alpha < 0.05$ , due to non-normal  
239 distribution (as shown by PCA analysis) of the metabolite data.

## 240 **Results**

### 241 **Plant growth, root morphology and root released organic anion analysis**

242 The plant phenotype and root released organic anions were examined to study the effects of P  
243 deficiency on oat growth and root exudates under hydroponic condition. After four weeks of  
244 growth under two different P regimes (1 and 100  $\mu\text{M}$   $\text{KH}_2\text{PO}_4$ ), a drastic reduction of shoots P  
245 concentration was observed in plants grown under P deficient conditions (P1), compared with  
246 P100 (0.90 vs 6.35  $\text{mg g}^{-1}$ ). Oat plants subjected to P1 treatment showed on average a 55%  
247 reduction in the total number of leaves, 44% more senescent leaves (number of senescent leaves:  
248 number of total leaves), 68% less shoot dry biomass and 96% greater root mass ratio (root dry  
249 biomass: total dry biomass) than P100 plants as shown in Fig. 1A-D. Moreover, P1 treatment  
250 plants showed shorter total root length (25%), less root surface area (27%) and more lateral roots  
251 (14%) than P100 plants (Fig. 2A-D). Furthermore, after four weeks, compared with P100 treated  
252 plants, which showed no detectable root released organic anions, P1 roots had higher exudation  
253 rates of citrate and malate, 927 and 81  $\text{nmol h}^{-1} \text{g}^{-1}$  root dry weight (DW) respectively, as shown  
254 in Fig. 2E. By contrast, no organic anions were detected in either P1 or P100 root exudates  
255 collected after two weeks treatment.

### 256 **Transcriptome analysis of root response to P deficiency**

257 Next, RNA-seq was performed to evaluate gene expression from P deficient roots of oat plants as  
258 compared to P sufficient roots. We did Blastx and GO analyses after the *dnORT* database was  
259 constructed as described in the Material and Methods part. Approximately 9.4% of the *dnORT*

260 transcripts could not be assigned to any Blastx hits (E-value > 1E-3) as shown in Supplementary  
261 Data Fig. S1. The blastx top hit species were: *Brachypodium distachyon* (22%), *Hordeum*  
262 *vulgare* subsp. *vulgare* (17%), *Aegilops tauschii* (15%), *Triticum urartu* (10%) and *Oryza sativa*  
263 *japonica* group (4%) (Fig. S2). Functional gene ontology (GO) classification of *dnORT*  
264 sequences suggested that the biological process was mainly represented by the term ‘cellular and  
265 metabolic processes’, and the most represented GO subcategories within the cellular component  
266 main term were ‘cell or cell part’ and ‘membrane or membrane part’. When the sequences were  
267 categorized according to the molecular function main term, 10,699 transcripts corresponded to  
268 ‘binding category’ and 10,522 sequences to ‘catalytic activity’ (Fig. S3). Putative functions (with  
269 InterProScan) were predicted for 62 % of the sequences (Fig. S4).

270 In total, 9,371 transcripts (7,817 up-regulated, 1,554 down-regulated) were differentially  
271 expressed in response to P deficiency as shown in Table 1. Gene ontology (GO) categories  
272 showed that up-regulated transcripts under P deficiency were categorized into more than 40  
273 groups, such as oxidation-reduction process, transmembrane transport, carbohydrate metabolic  
274 process, response to osmotic stress, biosynthetic process, pyruvate metabolism, tricarboxylic acid  
275 cycle, acid phosphatase, and CCAAT-binding complex (Fig. 3).

276 Reciprocal tblastx ( $E < 1E-10$ ) analysis showed that 24 oat transcripts which were up-  
277 regulated in P1 matched the conserved responsive genes previously found up-regulated in both  
278 rice and wheat (Oono *et al.*, 2013) as listed in Table 2. We also found 25 unique responsive  
279 transcripts (between 308 nt and 1672 nt) in oat roots that were up-regulated more than two-fold  
280 ( $p < 0.001$ , P1 RPKM means > 5), without any blast hits in currently available databases, i.e. they  
281 seem to be exclusively expressed in oat (Table 3).

282 Furthermore, as shown in Fig. 4 and Tables S1, S2, among the 7817 up-regulated transcripts,  
283 128 transcripts were annotated as transcription factors (TFs), 57 sequences assigned as acid  
284 phosphatases and 18 as phosphate transporters. In addition, there were two sequences similar to  
285 SIZ1, SPX domain-containing proteins and PHO1 (which transfers P from roots to shoots),  
286 respectively, and one sequence was annotated as PHO2. Transcripts associated with auxin  
287 responses that regulate root development, and with disease and fungus responses, were also  
288 detected, as shown in Supporting Information Table S3.

289 **Up-regulated transcripts associated with root-released organic anions**

290 The citric acid and glyoxylate cycles play important roles in synthesis of organic acids in plant  
291 tissues. To see if biosynthesis of organic acids could be altered by P deficiency, we mapped the  
292 annotated transcripts to genes that involved in citric acid and glyoxylate cycles. Our analysis  
293 revealed that 38 up-regulated transcripts identified under P1 treatment represent enzyme-  
294 encoding genes putatively involved in the citric acid and glyoxylate cycles (Fig. 5A-B and Table  
295 S4). In addition, organic anions were mainly exuded through plasma membrane located  
296 transporters. Hence, we further found 10 sequences which were associated with organic anion  
297 efflux transporters including the MATE efflux family (transporters that transport a broad range of  
298 substrates such as organic anions, plant hormones and secondary metabolites), citrate transporter  
299 (CT) and ALMT (aluminium-activated malate transporter), as shown in Fig. 5C and Table S4.

### 300 **RNA-seq validation by qRT-PCR**

301 To assess whether differential expressed transcripts could be confirmed by an alternate method,  
302 14 transcripts were selected and analysed by qRT-PCR using primers listed in Table S5.  
303 Transcripts known to be up-regulated in response to phosphate starvation, i.e. PHO2, PAP3,  
304 RNS1 (RNase), PHO1 and SPX, were confirmed by qRT-PCR which showed similar expression  
305 patterns to those analyzed by RNA-seq. Additionally, the expression of transcripts involved in  
306 root organic anion synthesis such as MSIL (malate synthase-isocitrate lyase), PEPC  
307 (phosphoenolpyruvate carboxylase), CS (citrate synthase), LMD (L-malate dehydrogenase),  
308 NADP-MD (NADP-dependent malate dehydrogenase) and efflux transporters like ALMT and  
309 MATE was also investigated by qRT-PCR. Among 14 transcripts evaluated by qRT-PCR, the  
310 trend of changes in 11 (79%) were consistent with the RNA-seq data (Fig. 6).

### 311 **Metabolome Analyses**

312 To assess the effects of gene expression in oat roots on overall metabolism, nonbiased metabolite  
313 profiling of oat roots was performed using GC-MS. We detected and identified 82 metabolites in  
314 oat roots subjected to P1 and P100, as provided in Table S6. Table 4 lists those metabolites that  
315 are significantly different ( $p < 0.05$ ,  $t$  test in MeV) between the P1 and P100 treatments as well as  
316 the P1/P100 response ratios (based on non-transformed data) and FDR correction (based on Log2  
317 transformed data). The primary metabolites were amino acids, organic acids, polyhydroxy acids,  
318 sugars, phosphates, polyols, and *N*-compounds. Most of the metabolites showed a response ratio

319 lower than 1, indicating a decrease in P1 roots; only eight metabolites were increased in P1 roots  
320 (Table 4 and Table S6).

321 PCA analysis of metabolite data using all 82 known metabolites as well as 22 alternative  
322 metabolites and 39 mass spectral metabolite tags (MSTs) indicated that PC1 nicely defines the  
323 difference between two groups and represents about 35.8% of the variation (Fig.7). However,  
324 some overlap in the samples can be seen and high variation within the samples of the same group  
325 can be observed, which probably suggested different levels of P deficiency in oat roots and some  
326 P100 treated plants might be suffering P deficiency due to rapid depletion of P in the solution.  
327 After FDR correction, only five metabolites showed significant differences between P1 and P100  
328 roots: phosphoric acid, mannose-6-phosphate, glucose-6-phosphate, glucopyranose and myo-  
329 inositol-phosphate, which indicated that the central metabolism might be stable in oat roots after  
330 10 days of P deficiency. Regarding the organic acids, all identified organic acids showed P1/P100  
331 ratios lower than 1 except for citric and malic acids, which showed P1/P100 ratios of 1.08 and  
332 1.23, respectively (Table 4 and Table S6).

### 333 **Discussion**

334 Phosphorus (P) deficiency severely limits plant growth and productivity. This is especially  
335 important for sustainable staple cereal crop production in the future. Understanding the molecular  
336 mechanisms underlying root and root-secreted organic anion responses to P deficiency in oat, one  
337 of the main cereal crops in the world, is of high interest for optimizing future oat production.

338 Hydroponics as a root environment influences root architecture, in particular root elongation  
339 due to reduced mechanical impedance in the absence of solids (Bengough *et al.*, 2001). Previous  
340 studies have suggested that root exudation by plants grown in hydroponics is different from root  
341 exudation by plants grown in soil (Neumann *et al.*, 2009; Wang *et al.*, 2015 & 2016).  
342 Nevertheless, the elimination of other variables such as impact of soil particles and soil  
343 microorganisms favour use of hydroponics in root exudation studies (Aulakh *et al.*, 2001; Cheng  
344 *et al.*, 2014; Dechassa and Schenk, 2004; Gahoonia *et al.*, 2000; Ligaba *et al.*, 2004). In addition,  
345 RNA-seq analysis also benefits from removing the influence of these variables on gene  
346 expression, while hydroponics use makes high quality RNA extraction easier.

347 Oono *et al.* (2011 & 2013) concluded that the highest number of responsive transcripts was  
348 observed in roots at 10 days after P deficiency in rice and wheat, while the plants' morphological

349 and physiological responses to P deficiency become prominent at around 30 days of P starvation  
350 (Cheng *et al.*, 2014; Oono *et al.*, 2011; Wang *et al.*, 2015). Hence, we studied transcriptome and  
351 metabolome, and root morphology and exudates at different time points (i.e., 10 days for RNA  
352 and metabolome samples and two or four weeks for root exudates) after the P1 and P100  
353 treatments. Our gene expression and metabolome profiles represent early to mid-term responses,  
354 while the others were mainly long-term P deficiency responses.

355 Based on our physiological analysis, we did not detect any organic anion exudation after two  
356 weeks of P-deficiency in oat. This might be due to: 1) the extracted organic anions were below  
357 the detection limit; 2) root released organic anions were affected by the plant developmental  
358 stage (Aulakh *et al.*, 2001; Watt and Evans, 1999; Wang *et al.*, 2017). Following four weeks of P-  
359 deficiency, under similar growth and sampling conditions, oat root had higher exudation rate of  
360 citrate than other species such as canola, rice, cabbage, carrot, barley, soybean and potato  
361 (Aulakh *et al.*, 2001; Dechassa and Schenk, 2004; Gahoonia *et al.*, 2000; Ligaba *et al.*, 2004;  
362 Liang *et al.*, 2013; Wang *et al.*, 2015), as well as white lupin (Cheng *et al.*, 2014; Watt and Evans,  
363 1999; Wang *et al.*, 2007) which is to our knowledge currently the most efficient species that uses  
364 root-secreted citrate to cope with P deficiency (Cheng *et al.*, 2011). Additionally, the high  
365 exudation rate of citrate by oat roots under P1 treatment corresponded well with our greenhouse  
366 experiment using clay-loam agricultural soils (Wang *et al.*, 2016). Therefore, exudation of citrate  
367 appeared to be a late response to P starvation in oat. Given that production and exudation of  
368 organic anions is a more carbon-costly process than other pathways (e.g., the production of root  
369 hairs and lateral roots) for plants (Lynch, 2007; Whipps, 1990), it might be economical to release  
370 organic anions just at a certain stage.

371 Transcripts encoding PEPC and malate synthase from a glyoxylate-like cycle, which are  
372 involved in organic anion production, as well as sequences assigned to citrate and malate efflux  
373 transporters were detected in the transcriptome of white lupin cluster roots under low P stress  
374 (O'Rourke *et al.*, 2013). By contrast, such transcripts were not reported in wheat, rice,  
375 *Arabidopsis* or potato studies (Hammond *et al.*, 2011; Oono *et al.*, 2011; Oono *et al.*, 2013;  
376 Misson *et al.*, 2005), probably due to these plants exhibiting a low exudation rate of organic  
377 anions under P deficiency (Aulakh *et al.*, 2001; Neumann and Romheld, 1999; Narang *et al.*,  
378 2000; Wang *et al.*, 2015). In P starved oat roots, we identified 38 up-regulated transcripts  
379 encoding almost all enzymes associated with the citric acid and glyoxylate cycles except for

380 fumarase and  $\alpha$ -ketoglutarate dehydrogenase. Moreover, a transcript annotated as malate  
381 synthase-isocitrate lyase (MSIL) was highly expressed (> 40-fold) under the P1 compared with  
382 the P100 treatment, suggesting an important role of the glyoxylate cycle in organic anion  
383 production in oat. This gene is of interest and could be used to improve P uptake in other species  
384 using genetic engineering. Exudation of organic anions may also lead to alteration of gene  
385 expression of enzymes involved in organic acid metabolism, but this is unlikely to be the case in  
386 the current study since no organic anion exudation was detected yet when we sampled RNA.

387 In white lupin, enhanced levels of citrate were observed in roots (2.2 fold) and cluster roots  
388 (7.6 fold) after 22 days P deficiency, whereas after 14 days P deficiency the changes were 1.4 and  
389 3.5 fold, respectively (Müller *et al.*, 2015), suggesting that changes in the metabolome mainly  
390 occurred after long-term P deficiency. Our oat root metabolome analysis indicated that most  
391 organic acids showed a general reduction after 10 days of P deficiency, which corresponded well  
392 with common bean roots after 21 days of low-P treatment (Hernández *et al.*, 2007), while slight  
393 (but not significant) increases in citric and malic acids were detected in our study. Previous  
394 studies have suggested that biosynthesis and exudation of organic anions has been associated  
395 with enhanced expression of genes encoding PEPC, malate dehydrogenase, citrate synthase and  
396 transporters like ALMT and MATE (de la Fuente *et al.*, 1997; Delhaize *et al.*, 2009; Johnson *et*  
397 *al.*, 1994; Koyama *et al.*, 2000; Watt and Evans, 1999; Wang *et al.*, 2013). However,  
398 interpretation of links between gene expression and organic acids biosynthesis and exudation  
399 should be done with caution, because enhanced gene expression does not necessarily result in  
400 enhanced enzyme levels (and enzyme activities). Also, other cellular conditions caused by P  
401 deficiency can affect endogenous enzyme function (Ryan *et al.*, 2001). Additionally, although a  
402 number of studies have shown associations between organic anion efflux and internal  
403 concentrations (Hoffland *et al.*, 1989; Neumann and Romheld, 1999), internal concentrations of  
404 organic anions are unlikely to directly regulate organic anions efflux in P-deficient plants  
405 (Keerthisinghe *et al.*, 1998; Ryan *et al.*, 2001; Watt and Evans, 1999). Rather, transporters are  
406 likely to be the most important regulators of organic anion exudation (Ryan *et al.*, 2001). We  
407 identified ten up-regulated transcripts encoding MATE and ALMT family members, and other  
408 citrate and malate transporters. While higher expression of transporter-encoding genes may  
409 increase the number of transporters per cell, the expression of these transcripts was not high  
410 (0.66-16.66 RPKM), and enhanced transcript accumulation cannot be assumed to equal increased

411 protein abundance. Furthermore, efflux is determined by both abundance and activity, with  
412 regulation of the latter still largely unknown.

413 Among the known genes expressed in P deficiency, a highly conserved PHR1-IPS1-  
414 miRNA399-PHO2 signalling cascade has been elucidated in Arabidopsis and rice (Lin *et al.*,  
415 2009; Oono *et al.*, 2013). PHR1 (PHR2 in rice) is a MYB-type transcription factor, acting as a  
416 key factor in regulating downstream P deficiency responsive gene expression. Both AtPHR1 and  
417 OsPHR2 were not very responsive to P deficiency, but their overexpression activated the  
418 expression of a number of P-starvation induced genes even under P sufficient conditions (Rubio  
419 *et al.*, 2001; Zhou *et al.*, 2008). We did not identify any transcript annotated as PHR1 or PHR2 in  
420 our *dnORT* database. We detected up-regulated SPX, PHO2, RNS1 and SIZ1 in oat. SPX may  
421 inhibit the expression of PHR1, and SIZ1 facilitates sumoylation of PHR1 and thereby regulates  
422 the post-translational modification of PHR1 (Chiou & Lin, 2011; Wu *et al.*, 2013), which likely  
423 explains why we could not detect differentially expressed PHR1 in oat and suggests that the  
424 PHR1-IPS1-miRNA399-PHO2 signalling cascade is likely also conserved in oat.

425 In our study, we also detected many CCAAT-box binding transcription factors, including  
426 Nuclear Factor (NF) Y subunits NF-YA, NF-YB and NF-YC, which respond to P deficiency in  
427 oat. CCAAT-box transcription factors, in particularly NFYA-B1, play essential roles in root  
428 development and P uptake in wheat (Qu *et al.*, 2015). Our previous study also found that root  
429 morphology, rhizosphere bacteria and root-colonizing mycorrhizal fungi were involved in the  
430 response to low P availability in oat (Wang *et al.*, 2016). The current study identified about 30  
431 up-regulated transcripts associated with auxin responses, which might regulate root morphology;  
432 more than 60 transcripts involved in disease response and 9 involved in responses to fungal  
433 infection. Additionally, 24 up-regulated transcripts under P deficiency found in the present study  
434 had been reported previously in rice and wheat (Oono *et al.* 2011 & 2013), suggesting that these  
435 genes are valuable indicators of P deficiency in cereal crops. Another 25 unique transcripts in oat  
436 that were up-regulated more than two-fold under P deficiency were identified. These will be  
437 studied further to investigate their roles related to P uptake in oat, in order to facilitate future  
438 improvements in oat production.

439 In summary, our current study provides new insights into the molecular mechanisms  
440 involved in root responses to P deficiency and the release of organic anions by P-starved oat roots.

441 The novel information generated in the present study enriches our understanding of oat  
442 adaptation to low P availability and contributes to future sustainable oat production.

#### 443 **Acknowledgements**

444 This study was supported by the strategic institute program (SIS) on “Opportunities for  
445 sustainable use of phosphorus in food production” at the Norwegian Institute of Bioeconomy  
446 Research (NIBIO). The authors thank Marit Almvik and Monica Skogen for their kind help with  
447 LC-MS/MS and RNA sample preparation, respectively. We are grateful to Prof. Nicholas Clarke  
448 for linguistic correction and to the Norwegian Sequencing Centre, Oslo, Norway, for library  
449 preparation and sequencing. The Norwegian Sequencing Centre, a national technology platform  
450 hosted by the University of Oslo and supported by the “Functional Genomics” and “Infrastructure”  
451 programs of the Research Council of Norway and the South-eastern Regional Health Authorities,  
452 provided the sequencing service. We thank Ines Fehrle and Joachim Kopka (both from Max  
453 Planck Institute of Molecular Plant Physiology, DE) for their excellent technical assistance and  
454 support in analysis of oat metabolites.

#### 455 **Author Contributions**

456 Y.W. contributed to the experimental design, sample preparation, plant biomass and root  
457 morphology measurements, data analyses and manuscript writing; J.L.C. contributed to the  
458 experimental design and conceived the study; E.L. did the sequence trimming, *de novo* assembly,  
459 annotation, and helped with the data analyses; T.A-M and A.E conducted metabolite  
460 measurements; L.P. helped with the qRT-PCR experiment. All authors revised and approved the  
461 final manuscript.



## References

- Alminger M, Eklund-Jonsson C.** 2008. Whole-grain cereal products based on a high-fibre barley or oat genotype lower post-prandial glucose and insulin responses in healthy humans. *European Journal of Nutrition* **47**(6), 294-300.
- Aulakh MS, Wassmann R, Bueno C, Kreuzwieser J, Rennenberg H.** 2001. Characterization of Root Exudates at Different Growth Stages of Ten Rice Cultivars. *Plant Biology* **3**,139-148.
- Bengough AG, McKenzie BM, Hallett PD, Valentine TA.** 2011. Root elongation, water stress, and mechanical impedance: a review of limiting stresses and beneficial root tip traits. *Journal of Experimental Botany* **62**, 59-68.
- Cheng L, Bucciarelli B, Shen J, Allan D, Vance CP.** 2011. Focus Issue on Phosphorus Plant Physiology: Update on Lupin Cluster Roots. Update on White Lupin Cluster Root Acclimation to Phosphorus Deficiency. *Plant Physiology* **156**(3), 1025.
- Cheng L, Tang X, Vance CP, White PJ, Zhang F, Shen J.** 2014. Interactions between light intensity and phosphorus nutrition affect the phosphate-mining capacity of white lupin (*Lupinus albus* L.). *Journal of Experimental Botany* **65**(12), 2995-3003.
- Chiou T-J, Lin S-I.** 2011. Signaling network in sensing phosphate availability in plants. *Annual Review of Plant Biology* **62**, 185-206.
- Conesa A, Götz S, García-Gómez JM, Terol J, Talón M, Robles M.** 2005. Blast2GO: a universal tool for annotation, visualization and analysis in functional genomics research. *Bioinformatics* **21**(18), 3674-3676.
- Cordell D, Drangert J-O, White S.** 2009. The story of phosphorus: global food security and food for thought. *Global Environmental Change* **19**(2), 292-305.
- Dechassa N, Schenk MK.** 2004. Exudation of organic anions by roots of cabbage, carrot, and potato as influenced by environmental factors and plant age. *Journal of Plant Nutrition and Soil Science* **167**, 623-629.
- Delhaize E, Taylor P, Hocking PJ, Simpson RJ, Ryan PR, Richardson AE.** 2009. Transgenic barley (*Hordeum vulgare* L.) expressing the wheat aluminium resistance gene (TaALMT1) shows enhanced phosphorus nutrition and grain production when grown on an acid soil. *Plant Biotechnology Journal* **7**(5), 391-400.
- Deng W, Wang Y, Liu Z, Cheng H, Xue Y.** 2014. HemI: a toolkit for illustrating heatmaps. *PLoS One* **9**(11), e111988.
- de la Fuente JM, Ramirez-Rodriguez V, Cabrera-Ponce JL, Herrera-Estrella L.** 1997. Aluminum tolerance in transgenic plants by altering of citrate synthesis. *Science* **276**,1566-1568.

- Erbán A, Schauer N, Fernie AR, Kopka J.** 2007. Nonsupervised construction and application of mass spectral and retention time index libraries from time-of-flight gas chromatography-mass spectrometry metabolite profiles. *Methods in Molecular Biology* **358**, 19-38.
- Faucon M-P, Houben D, Reynoird J-P, Mercadal-Dulaurent A-M, Armand R, Lambers H.** 2015. Advances and Perspectives to Improve the Phosphorus Availability in Cropping Systems for Agroecological Phosphorus Management. *Advances in Agronomy: Academic Press*.
- Gahoonia TS, Asmar F, Giese H, Gissel-Nielsen G, Nielsen NE.** 2000. Root-released organic acids and phosphorus uptake of two barley cultivars in laboratory and field experiments. *European Journal of Agronomy* **12**(3), 281-289.
- Gutierrez-Gonzalez JJ, Garvin DF.** 2016. Subgenome-specific assembly of vitamin E biosynthesis genes and expression patterns during seed development provide insight into the evolution of oat genome. *Plant Biotechnology Journal* **14**(11), 2147-2157.
- Gutierrez-Gonzalez JJ, Tu ZJ, Garvin DF.** 2013. Analysis and annotation of the hexaploid oat seed transcriptome. *BMC Genomics* **14**, 471.
- Hammond JP, Broadley MR, Bowen HC, Spracklen WP, Hayden RM, White PJ.** 2011. Gene expression changes in phosphorus deficient potato (*Solanum tuberosum* L.) leaves and the potential for diagnostic gene expression markers. *PLoS One* **6**(9), e24606.
- Hedley M, White R, Nye P.** 1982. Plant-induced changes in the rhizosphere of rape (*Brassica napus* var. Emerald) seedlings. *New Phytologist* **91**(1), 45-56.
- Hermans C, Hammond JP, White PJ, Verbruggen N.** 2006. How do plants respond to nutrient shortage by biomass allocation? *Trends in Plant Science* **11**(12), 610-617.
- Hernández G, Ramírez M, Valdés-López O, et al.** 2007. Phosphorus stress in common bean: root transcript and metabolic responses. *Plant Physiology* **144**, 752-767.
- Hill DD.** 1931. Oat production in Western Oregon. [ir.library.oregonstate.edu](http://ir.library.oregonstate.edu)
- Hoffland E, Findenegg GR, Nelemans JA.** 1989. Solubilization of rock phosphate by rape. *Plant and Soil* **113**(2), 155-160.
- Johnson JF, Allan DL, Vance CP.** 1994. Phosphorus stress-induced proteoid roots show altered metabolism in *lupinus albus*. *Plant Physiology* **104**, 657-665.
- Jones DL.** 1998. Organic acids in the rhizosphere—a critical review. *Plant and Soil* **205**(1), 25-44.
- Keerthisinghe G, Hocking PJ, Ryan PR, Delhaize E.** 1998. Effect of phosphorus supply on the formation and function of proteoid roots of white lupin. *Plant Cell and Environment* **21**, 467-478.
- Kemen AC, Honkanen S, Melton RE, Findlay KC, Mugford ST, Hayashi K, Haralampidis K, Rosser SJ, Osbourn A.** 2014. Investigation of triterpene synthesis and regulation in oats reveals a

- role for  $\beta$ -amyryn in determining root epidermal cell patterning. *Proceedings of the National Academy of Sciences* **111**(23), 8679-8684.
- Kopka J, Schauer N, Krueger S, et al.** 2005. GMD@CSB.DB: the Golm Metabolome Database. *Bioinformatics* **21**, 1635-1638.
- Koyama H, Kawamura A, Kihara T, Hara T, Takita E.** 2000. Overexpression of mitochondrial citrate synthase in *Arabidopsis thaliana* improved growth on a phosphorus limited soil. *Plant Cell and Physiology* **40**, 482-488.
- Lambers H, Clode P, Hawkins H, Laliberté E, Oliveira R, Reddell P, Shane M, Stitt M, Weston P.** 2015. Metabolic adaptations of the non-mycotrophic Proteaceae to soil with a low phosphorus availability: Phosphorus Metabolism in Plants in the Post-genomic Era: From Gene to Ecosystem. Wiley-Blackwell, Oxford, UK.
- Lambers H, Shane MW, Cramer MD, Pearse SJ, Veneklaas EJ.** 2006. Root structure and functioning for efficient acquisition of phosphorus: Matching morphological and physiological traits. *Annals of Botany* **98**(4), 693-713.
- Liang C, Piñeros MA, Tian J, Yao Z, Sun L, Liu J, Liao H.** 2013. Low pH, aluminum, and phosphorus coordinately regulate malate exudation through GmALMT1 to improve soybean adaptation to acid soils. *Plant Physiology* **161**,1347-1361.
- Ligaba A, Shen H, Shibata K, Yamamoto Y, Tanakamaru S, Matsumoto H.** 2004. The role of phosphorus in aluminium-induced citrate and malate exudation from rape (*Brassica napus*). *Physiologia Plantarum* **120**, 575-584.
- Lin WY, Lin SI, Chiou TJ.** 2009. Molecular regulators of phosphate homeostasis in plants. *Journal of Experimental Botany* **60**(5),1427-1438.
- López-Bucio J, Nieto-Jacobo MaF, Ramírez-Rodríguez V, Herrera-Estrella L.** 2000. Organic acid metabolism in plants: from adaptive physiology to transgenic varieties for cultivation in extreme soils. *Plant Science* **160**(1), 1-13.
- Luedemann A, Strassburg K, Erban A, Kopka J.** 2008. TagFinder for the quantitative analysis of gas chromatography-mass spectrometry (GC-MS)-based metabolite profiling experiments. *Bioinformatics* **24**, 732-737.
- Lynch JP.** 2007. Roots of the second green revolution. *Australian Journal of Botany* **55**, 493-512.
- Lynch JP.** 2011. Root phenes for enhanced soil exploration and phosphorus acquisition: tools for future crops. *Plant Physiology* **156**(3), 1041-1049.
- Misson J, Raghothama KG, Jain A, Jouhet J, Block MA, Bligny R, Ortet P, Creff A, Somerville S, Rolland N.** 2005. A genome-wide transcriptional analysis using *Arabidopsis thaliana* Affymetrix

- gene chips determined plant responses to phosphate deprivation. Proceedings of the National Academy of Sciences USA **102**(33), 11934-11939.
- Miura K, Rus A, Sharkhuu A, Yokoi S, Karthikeyan AS, Raghothama KG, Yun DJ.** 2005. The Arabidopsis SUMO E3 ligase SIZ1 controls phosphate deficiency responses. Proceedings of the National Academy of Sciences USA **102**(21), 7760-7765.
- Müller J, Gödde V, Niehaus K and Zörb C.** 2015. Metabolic Adaptations of White Lupin Roots and Shoots under Phosphorus Deficiency. *Frontiers in Plant Science*. **6**, 1014. doi: 10.3389/fpls.2015.01014
- Narang RA, Bruene A, Altmann T.** 2000. Analysis of phosphate acquisition efficiency in different Arabidopsis accessions. *Plant Physiology* **124**(4), 1786-1799.
- Nazare JA, Normand S, Oste Triantafyllou A, Brac de la Perrière A, Desage M, Laville M.** 2009. Modulation of the postprandial phase by beta-glucan in overweight subjects: effects on glucose and insulin kinetics. *Molecular Nutrition & Food Research* **53**(3), 361-369.
- Nazeri NK, Lambers H, Tibbett M, Ryan MH.** 2014. Moderating mycorrhizas: arbuscular mycorrhizas modify rhizosphere chemistry and maintain plant phosphorus status within narrow boundaries. *Plant Cell and Environment* **37**(4), 911-921.
- Neumann G, Romheld V.** 1999. Root excretion of carboxylic acids and protons in phosphorus deficient plants. *Plant and Soil* **211**, 121-130.
- Neumann G, George T, Plassard C.** 2009. Strategies and methods for studying the rhizosphere—the plant science toolbox. *Plant and Soil* **321**, 431–456.
- O'Rourke JA, Yang SS, Miller SS, et al.** 2013. An RNA-Seq transcriptome analysis of orthophosphate-deficient white lupin reveals novel insights into phosphorus acclimation in plants. *Plant Physiology* **161**(2), 705-724.
- Oono Y, Kawahara Y, Kanamori H, Mizuno H, Yamagata H, Yamamoto M, Hosokawa S, Ikawa H, Akahane I, Zhu Z.** 2011. mRNA-Seq reveals a comprehensive transcriptome profile of rice under phosphate stress. *Rice* **4**(2), 50-65.
- Oono Y, Kobayashi F, Kawahara Y, Yazawa T, Handa H, Itoh T, Matsumoto T.** 2013. Characterisation of the wheat (*Triticum aestivum* L.) transcriptome by de novo assembly for the discovery of phosphate starvation-responsive genes: gene expression in Pi-stressed wheat. *BMC Genomics* **14**(1), 1-14.
- Pandey R, Meena SK, Krishnapriya V, Ahmad A, Kishora N.** 2014. Root carboxylate exudation capacity under phosphorus stress does not improve grain yield in green gram. *Plant Cell Reports* **33**(6), 919-928.

- Pang J, Yang J, Lambers H, Tibbett M, Siddique KH, Ryan MH.** 2015. Physiological and morphological adaptations of herbaceous perennial legumes allow differential access to sources of varying soluble phosphate. *Physiologia Plantarum* **154**(4), 511-525.
- Panigrahy M, Rao DN, Sarla N.** 2009. Molecular mechanisms in response to phosphate starvation in rice. *Biotechnology Advances* **27**(4), 389-397.
- Pearse SJ, Veneklaas EJ, Cawthray G, Bolland MD, Lambers H.** 2007. Carboxylate composition of root exudates does not relate consistently to a crop species' ability to use phosphorus from aluminium, iron or calcium phosphate sources. *New Phytologist* **173**(1), 181-190.
- Plaxton WC, and Tran HT.** 2011. Metabolic adaptations of phosphate-starved plants. *Plant Physiology* **156**(3), 1006-1015.
- Qu B, He X, Wang J, Zhao Y, Teng W, Shao A, Zhao X, Ma W, Wang J, Li B.** 2015. A wheat CCAAT box-binding transcription factor increases the grain yield of wheat with less fertilizer input. *Plant Physiology* **167**(2), 411-423.
- Rubio V, Linhares F, Solano R, Martín AC, Iglesias J, Leyva A, Paz-Ares J.** 2001. A conserved MYB transcription factor involved in phosphate starvation signaling both in vascular plants and in unicellular algae. *Genes & Development* **15**(16), 2122-2133.
- Ryan P, Delhaize E, Jones D.** 2001. Function and mechanism of organic anion exudation from plant roots. *Annual Review of Plant Biology* **52**(1), 527-560.
- Saeed AI, Bhagabati NK, Braisted JC, et al.** 2006. TM4 microarray software suite. *Methods in Enzymology* **411**, 134-193.
- Sawers RJ, Svane SF, Quan C, et al.** 2017. Phosphorus acquisition efficiency in arbuscular mycorrhizal maize is correlated with the abundance of root-external hyphae and the accumulation of transcripts encoding PHT1 phosphate transporters. *New Phytologist* **214**(2), 632-643.
- Schauer N, Steinhauser D, Strelkov S, et al.** 2005. GC-MS libraries for the rapid identification of metabolites in complex biological samples. *FEBS Letter* **579**, 1332-1337.
- Smith SE, Smith FA, Jakobsen I.** 2003. Mycorrhizal fungi can dominate phosphate supply to plants irrespective of growth responses. *Plant Physiology* **133**(1), 16-20.
- Stewart D and McDougall G.** 2014. Oat agriculture, cultivation and breeding targets: implications for human nutrition and health. *British Journal of Nutrition* **112**, S50-57.
- Strehmel N, Hummel J, Erban A, Strassburg K, Kopka J.** 2008. Retention index thresholds for compound matching in GC-MS metabolite profiling. *Journal of Chromatography. B, Analytical Technologies in the Biomedical and Life Sciences* **871**, 182-190.

- Thimm O, Bläsing O, Gibon Y, Nagel A, Meyer S, Krüger P, Selbig J, Müller LA, Rhee SY, Stitt M.** 2004. MAPMAN: a user-driven tool to display genomics data sets onto diagrams of metabolic pathways and other biological processes. *Plant Journal* **37**(6), 914-939.
- Valeur J, Puaschitz NG, Midtvedt T, Berstad A.** 2016. Oatmeal porridge: impact on microflora-associated characteristics in healthy subjects. *British Journal of Nutrition* **115**(1), 62-67.
- Vance CP, Uhde-Stone C, Allan DL.** 2003. Phosphorus acquisition and use: critical adaptations by plants for securing a nonrenewable resource. *New Phytologist* **157**(3), 423-447.
- Wagner C, Sefkow M, Kopka J.** 2003. Construction and application of a mass spectral and retention time index database generated from plant GC/EI-TOF-MS metabolite profiles. *Phytochemistry* **62**, 887-900.
- Wang BL, Shen JB, Zhang WH, Zhang FS, Neumann G.** 2007. Citrate exudation from white lupin induced by phosphorus deficiency differs from that induced by aluminum. *New Phytologist* **176**, 581-589.
- Wang Y, Krogstad T, Clarke N, Øgaard A, Clarke JL.** 2017. Impact of phosphorus on rhizosphere organic anions of wheat at different growth stages under field conditions. *AoB Plants* **9** (plx008).  
Doi: 10.1093/aobpla/plx008
- Wang Y, Krogstad T, Liu Clarke J, Hallama M, Øgaard A, Eich-Greatorex S, Kandeler E, Clarke N.** 2016. Rhizosphere organic anions play a minor role in improving crop species' ability to take up residual phosphorus (P) in agricultural soils low in P availability. *Frontiers in Plant Science* **7**(1664). doi: 10.3389/fpls.2016.01664
- Wang Y, Xu H, Kou J, Shi L, Zhang C, Xu F.** 2013. Dual effects of transgenic *Brassica napus* overexpressing CS gene on tolerances to aluminum toxicity and phosphorus deficiency. *Plant and Soil* **362**(1-2), 231-246.
- Wang YL, Almvik M, Clarke N, Eich-Greatorex S, Ogaard AF, Krogstad T, Lambers H, Clarke JL.** 2015. Contrasting responses of root morphology and root-exuded organic acids to low phosphorus availability in three important food crops with divergent root traits. *AoB Plants* **7** (plv097). doi: 10.1093/aobpla/plv097
- Watt M, Evans JR.** 1999. Linking Development and Determinacy with Organic Acid Efflux from Proteoid Roots of White Lupin Grown with Low Phosphorus and Ambient or Elevated Atmospheric CO<sub>2</sub> Concentration. *Plant Physiology* **120**, 705-716.
- Whipps JM.** 1990. Carbon economy. Book chapter of *The rhizosphere*. 59-97.
- Whitehead A, Beck EJ, Tosh S, Wolever TM.** 2014. Cholesterol-lowering effects of oat  $\beta$ -glucan: a meta-analysis of randomized controlled trials. *The American Journal of Clinical Nutrition* **100**(6),1413-1421.

- Wu P, Shou H, Xu G, Lian X.** 2013. Improvement of phosphorus efficiency in rice on the basis of understanding phosphate signaling and homeostasis. *Current Opinion in Plant Biology* **16**(2), 205-212.
- Yang XJ, Finnegan PM.** 2010. Regulation of phosphate starvation responses in higher plants. *Annals of Botany* **105**(4), 513-526.
- Zhang Z, Liao H, Lucas WJ.** 2014. Molecular mechanisms underlying phosphate sensing, signaling, and adaptation in plants. *Journal of Integrative Plant Biology* **56**(3), 192-220.
- Zhou J, Jiao F, Wu Z, Li Y, Wang X, He X, Wu P.** 2008. OsPHR2 is involved in phosphate-starvation signaling and excessive phosphate accumulation in shoots of plants. *Plant Physiology* **146**(4), 1673-1686.

## Supplementary Data

The following supplementary data is available for this article:

**Fig. S1** Data distribution of Blastx hits of *dn*ORT sequences.

**Fig. S2** The Blastx top-hit species distribution of *dn*ORT sequences.

**Fig. S3** Functional gene ontology (GO) classification of *dn*ORT sequences.

**Fig. S4** Putative functions (with InterProScan) distribution of *dn*ORT sequences.

**Table S1.** Up-regulated transcription factors under P deficiency.

**Table S2.** Up-regulated transcripts predicted to be acid phosphatases (APases), phosphate transporters and other known genes related to P deficiency.

**Table S3.** Up-regulated transcripts associated with auxin responses, disease responses and responses to fungal infection under P deficiency.

**Table S4.** Up-regulated transcripts associated with organic anion production and efflux under P deficiency.

**Table S5.** Primers used in the present study.

**Table S6.** GC-MS metabolite profiles.



## Figure Legends

**Figure 1. Plant growth response to P1 and P100 treatments.** (A) Total leaves, (B) Senescent leaves, (C) Shoot dry weight, and (D) Root mass ratio. Error bars indicate SE (n = 4). Significant differences are indicated (ns, not significant; \*\*\*,  $p < 0.001$ ).

**Figure 2. Oat root response to P1 and P100 treatments.** (A) Representative photos of root structure, (B) Root length, (C) Root surface area, (D) Number of root tips, and (E) Root released organic anions. Error bars indicate SE (n = 4). Significant differences are indicated (ns, not significant; \*\*\*,  $p < 0.001$ ).

**Figure 3. Functional annotation of up-regulated sequences based on gene ontology (GO) categorization.** y-axis indicates the category, x-axis the percentage of transcripts in a category.

**Figure 4. Heat map of expression profiling of up-regulated transcription factors (TFs) and selected known genes related to P deficiency.** P1 induced up-regulated ( $p < 0.05$ ) TFs (A) and sequences assigned to APases, phosphate transporters (PHT), SPX protein, SIZ1 and PHO1 (B). Note that transcripts with RPKM  $< 3$  are presented in Supporting Information Tables S1 and S2. The colour bar indicates the expression levels [represented as  $\log_2$  (RPKM means)], red colour indicates high expression level while blue indicates low expression level.

**Figure 5. Up-regulated sequences associated with organic anion production and efflux under P deficiency (P1).** (A) Schematic representation of metabolic pathways including citric acid and glyoxylate cycles related to organic anion production that were up-regulated ( $p < 0.05$ ) under P1 (B) and up-regulated organic anion transporters responsive to P deficiency (C). The colour bar indicates the expression levels [represented as  $\log_2$  (RPKM means)], red colour indicates high expression level while blue indicates low expression level and black colour indicates RPKM=0.

**Figure 6. Expression of candidate known genes related to low P stress, and up-regulated transcripts associated with organic anion production and efflux under P1 as determined using RNA-Seq and qRT-PCR.** Fourteen genes were selected and analysed using qRT-PCR for both P1 and P100 treatments. Transcript expression levels were normalized using the internal controls  $\beta$ -actin and EF1 $\alpha$  (see Methods section). Relative expression values were calculated based on means of four biological replicates (with three technical replicates) under P1 and P100

treatments. Transcripts with statistically insignificant ( $p > 0.05$ ) changes in expression compared with P100 roots are denoted as ns. Fold changes based on RPKM values derived from RNA-seq are plotted on the same graph. The transcript IDs for each gene are listed in Supporting Information Table S5.

**Figure 7. Principal component (PC) scores of metabolic variances in oat roots ( $n=8 \times 2$ ).** Oat plants grown in P1(circles) and P100 (triangles) solutions for 10 days were used.

**Table 1.** Transcriptome statistics.

|                              |             |
|------------------------------|-------------|
| Total number of reads        | 215,087,481 |
| Assembled contigs            | 207,017     |
| Minimum length (nt)          | 200         |
| Maximum length (nt)          | 13,319      |
| Mean length (nt)             | 801         |
| Contigs larger than 1,000 nt | 9631        |
| Up-regulated contigs         | 7,817       |
| Down-regulated contigs       | 1,554       |
| Annotated contigs            | 41,679      |

nt: nucleotides

**Table 2.** Conserved responsive transcripts found in oat, wheat and rice under P deficiency.

| <i>dn</i> ORT ID | Rice proteins   | Wheat_proteins (TRIAE_CS42)     | P1<br>RPKM | P100<br>RPKM | Fold change<br>P1/P100 | Gene    | Gene annotation                                                   |
|------------------|-----------------|---------------------------------|------------|--------------|------------------------|---------|-------------------------------------------------------------------|
| Contig000022     | Os05t0137400-01 | 1AS_TGACv1_020885_AA0080310.2.1 | 107.9      | 48.1         | 2.2                    |         | Similar to aspartic protease precursor                            |
| Contig000835     | Os05t0387200-01 | 1DL_TGACv1_061485_AA0196630.2.1 | 13.5       | 1.7          | 8.0                    | SQD1    | Sulphite: UDP-glucose sulfotransferase                            |
| Contig010807     | Os10t0500600-01 | 1DL_TGACv1_062297_AA0212030.5.1 | 48.3       | 22.6         | 2.1                    |         | Zinc finger, C2H2-like domain containing protein                  |
| Contig011660     | Os07t0100300-02 | 2AL_TGACv1_094153_AA0293430.1.1 | 17.4       | 1.3          | 13.4                   |         | Glycosyl transferase, group 1 domain containing protein           |
| Contig009578     | Os10t0100500-01 | 2AS_TGACv1_113238_AA0353330.1.1 | 61.3       | 11.4         | 5.4                    |         | Serine/threonine protein kinase-related domain containing protein |
| Contig001778     | Os07t0622200-01 | 2AS_TGACv1_113290_AA0354140.2.1 | 71.8       | 68.0         | 1.1                    |         | Similar to M-160-u1_1                                             |
| Contig009737     | Os07t0630400-01 | 2BS_TGACv1_146583_AA0468610.1.1 | 5.2        | 1.1          | 4.8                    | OsRNS1  | Ribonuclease T2 family protein                                    |
| Contig005229     | Os04t0555300-01 | 2DL_TGACv1_158105_AA0509380.4.1 | 41.6       | 9.1          | 4.6                    |         | Similar to glycerol 3-phosphate permease                          |
| Contig019750     | Os04t0652700-01 | 2DL_TGACv1_158583_AA0522480.2.1 | 4.8        | 1.2          | 4.0                    |         | Similar to nuclease PA3                                           |
| Contig061747     | Os01t0128200-01 | 3AS_TGACv1_210696_AA0677330.2.1 | 4.0        | 1.4          | 2.8                    |         | Similar to nuclease I                                             |
| Contig013859     | Os01t0897200-04 | 3B_TGACv1_224141_AA0792910.2.1  | 68.9       | 21.8         | 3.2                    | OsRNS2  | Ribonuclease 2 precursor                                          |
| Contig004306     | Os06t0115600-01 | 4AL_TGACv1_289135_AA0965550.1.1 | 76.7       | 53.6         | 1.4                    |         | Similar to CYCLOPS                                                |
| Contig026884     | Os08t0299400-01 | 4AL_TGACv1_289998_AA0980080.1.1 | 13.9       | 0.0          |                        | MGD     | MGDG synthase type A                                              |
| Contig003298     | Os03t0238600-01 | 4AS_TGACv1_308481_AA1028160.1.1 | 273.2      | 54.6         | 5.0                    | PAP     | Similar to purple APase                                           |
| Contig007532     | Os09t0553200-01 | 5AL_TGACv1_374888_AA1211020.2.1 | 504.8      | 181.3        | 2.8                    | UGPase  | UDP-glucose pyrophosphorylase                                     |
| Contig003667     | Os09t0478300-01 | 5AL_TGACv1_376126_AA1232370.2.1 | 17.7       | 7.5          | 2.4                    |         | Conserved hypothetical protein                                    |
| Contig026720     | Os12t0554500-00 | 5AS_TGACv1_393365_AA1271860.2.1 | 11.6       | 0.1          | 167.7                  |         | Lipase, class 3 family protein                                    |
| Contig116061     | Os09t0379900-02 | 5BL_TGACv1_404442_AA129920.1.1  | 1.6        | 0.6          | 2.5                    |         | Endo-1,3(4)-beta-glucanase 2 like                                 |
| Contig073770     | Os08t0433200-01 | 5BL_TGACv1_404654_AA1307490.1.1 | 28.0       | 5.4          | 5.1                    |         | Conserved hypothetical protein                                    |
| Contig007245     | Os09t0315700-01 | 5BL_TGACv1_407230_AA1354660.1.1 | 58.1       | 20.4         | 2.9                    |         | Phosphoenolpyruvate carboxylase family protein                    |
| Contig000670     | Os02t0809800-01 | 6BL_TGACv1_501820_AA1620890.2.1 | 70.5       | 22.9         | 3.1                    | PHO1:H2 | Root-to-shoot inorganic phosphate (Pi) transfer                   |
| Contig000259     | Os06t0178900-01 | 7BS_TGACv1_592527_AA1939830.5.1 | 184.6      | 82.2         | 2.2                    |         | Vacuolar H <sup>+</sup> -pyrophosphatase                          |
| Contig027611     | Os05t0489900-01 | U_TGACv1_641100_AA2085080.2.1   | 13.9       | 6.4          | 2.2                    |         | Calcium/calmodulin-dependent protein kinase                       |
| Contig044047     | Os09t0321200-00 | U_TGACv1_642666_AA2121200.1.1   | 0.9        | 0.1          | 11.0                   |         | Similar to carotenoid cleavage dioxygenase                        |

**Table 3.** Unique P responsive transcripts found in oat.

| Oat transcript ID | <i>p</i> -value | P1 - RPKM | P100 - RPKM | Fold change<br>P1/P100 | Transcript length<br>(nt) |
|-------------------|-----------------|-----------|-------------|------------------------|---------------------------|
| Contig000170      | 0.0001          | 339.8     | 7.6         | 44.5                   | 486                       |
| Contig001596      | 0.0005          | 27.8      | 12.0        | 2.3                    | 582                       |
| Contig002497      | 0.0001          | 10.3      | 1.4         | 7.5                    | 452                       |
| Contig005093      | 0.0007          | 193.8     | 42.9        | 4.5                    | 567                       |
| Contig006100      | 0.0001          | 80.8      | 2.0         | 39.6                   | 308                       |
| Contig006686      | 0.0000          | 60.8      | 1.0         | 59.6                   | 400                       |
| Contig007919      | 0.0002          | 67.4      | 0.5         | 134.2                  | 586                       |
| Contig009266      | 0.0003          | 5.2       | 0.1         | 35.3                   | 1017                      |
| Contig010063      | 0.0001          | 32.0      | 13.9        | 2.3                    | 1256                      |
| Contig011518      | 0.0000          | 16.3      | 0.6         | 28.0                   | 978                       |
| Contig022489      | 0.0000          | 13.6      | 0.0         | 907.5                  | 1198                      |
| Contig023173      | 0.0005          | 116.7     | 47.5        | 2.5                    | 410                       |
| Contig024878      | 0.0002          | 52.3      | 23.6        | 2.2                    | 454                       |
| Contig024909      | 0.0005          | 7.3       | 0.1         | 81.8                   | 1004                      |
| Contig029950      | 0.0001          | 8.9       | 0.4         | 24.7                   | 817                       |
| Contig034195      | 0.0003          | 17.7      | 8.4         | 2.1                    | 812                       |
| Contig035653      | 0.0004          | 5.5       | 1.7         | 3.1                    | 702                       |
| Contig039702      | 0.0005          | 8.3       | 0.7         | 11.6                   | 447                       |
| Contig040117      | 0.0000          | 14.3      | 0.2         | 77.4                   | 630                       |
| Contig040132      | 0.0000          | 7.2       | 0.0         | --                     | 402                       |
| Contig045423      | 0.0000          | 7.0       | 0.0         | --                     | 410                       |
| Contig045562      | 0.0005          | 5.7       | 1.5         | 3.7                    | 1672                      |
| Contig052573      | 0.0001          | 5.4       | 2.2         | 2.4                    | 673                       |
| Contig068492      | 0.0001          | 23.4      | 3.2         | 7.3                    | 474                       |
| Contig068533      | 0.0001          | 6.4       | 2.4         | 2.7                    | 1167                      |

**Table 4.** Known metabolites identified by GC-MS in oat roots from P1 and P100 treated plants with  $p < 0.05$ .

| Class                    | Metabolite                       | Response ratio<br>P1/P100 | $p$ value     |
|--------------------------|----------------------------------|---------------------------|---------------|
| <b>Organic acids</b>     | 2-hydroxy-glutaric acid          | 0.10                      | 0.0023        |
|                          | 2-oxo-glutaric acid              | 0.08                      | 0.0117        |
|                          | Pantothenic acid                 | 0.69                      | 0.0118        |
|                          | Pyruvic acid                     | 0.17                      | 0.0101        |
|                          | Succinic acid                    | 0.32                      | 0.0063        |
| <b>Amino acids</b>       | 4-amino-butanoic acid            | 0.81                      | 0.0209        |
|                          | Methionine                       | 0.25                      | 0.0253        |
|                          | Valine                           | 0.35                      | 0.0460        |
| <b>N-compounds</b>       | 5-methylthio-adenosine           | 0.22                      | 0.0087        |
|                          | Putrescine                       | 0.29                      | 0.0063        |
|                          | Spermidine                       | 0.56                      | 0.0446        |
| <b>Phenylpropanoids</b>  | 4-hydroxy-cinnamic acid          | 0.75                      | 0.0372        |
| <b>Phosphates</b>        | Ethanolaminephosphate            | 0.30                      | 0.0404        |
|                          | Fructose-6-phosphate             | 0.43                      | 0.0063        |
|                          | Glucose-6-phosphate              | 0.19                      | <b>0.0011</b> |
|                          | Glycerophosphoglycerol           | 0.27                      | 0.0367        |
|                          | Mannose-6-phosphate              | 0.22                      | <b>0.0011</b> |
|                          | myo-Inositol-phosphate           | 0.25                      | <b>0.0016</b> |
|                          | Phosphoric acid                  | 0.28                      | <b>7.8E-4</b> |
|                          | Phosphoric acid monomethyl ester | 0.41                      | 0.0118        |
|                          | Glucose-6-phosphate              | 0.20                      | 0.0034        |
| <b>Polyhydroxy Acids</b> | Lyxonic acid                     | 0.48                      | 0.0039        |
|                          | Ribonic acid                     | 0.45                      | 0.0087        |
| <b>Polyols</b>           | Arabitol                         | 0.56                      | 0.0087        |
|                          | Inositol, myo-                   | 0.84                      | 0.0157        |
|                          | Ribitol                          | 0.49                      | 0.0157        |
| <b>Sugars</b>            | Sucrose                          | 0.47                      | 0.0357        |
|                          | Xylose                           | 0.65                      | 0.0209        |
|                          | Glucopyranose                    | 0.27                      | <b>0.0016</b> |
|                          | Maltose                          | 0.53                      | 0.0207        |

FDR correction with  $\alpha < 0.05$  is indicated by bold format of the  $p$  value.

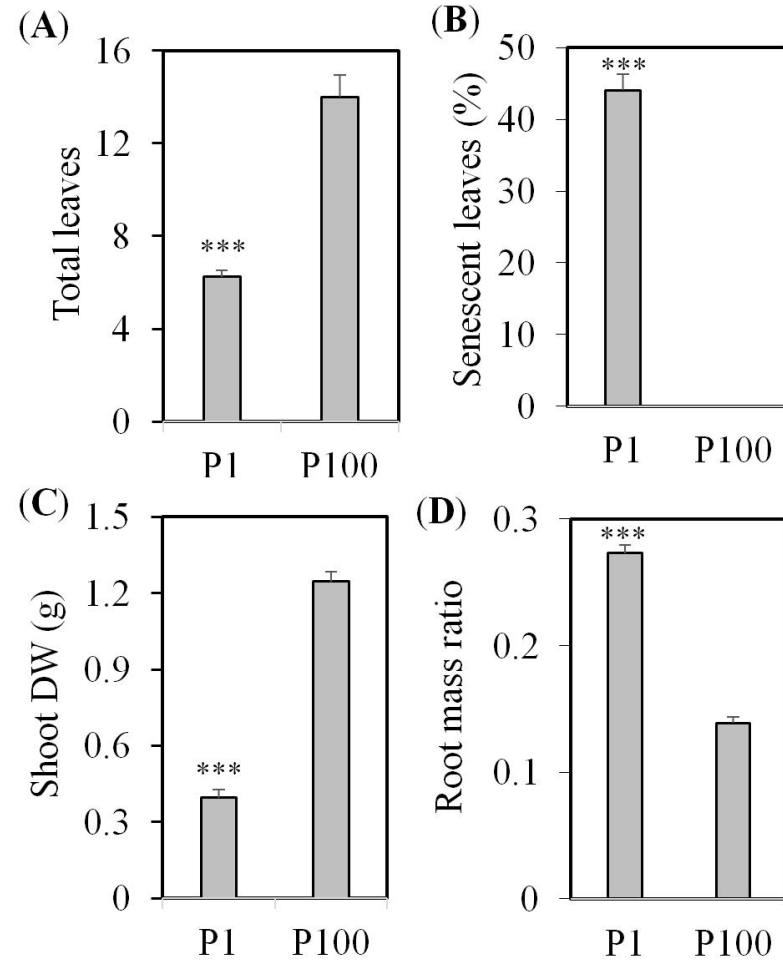

Wang *et al.*, Fig.1

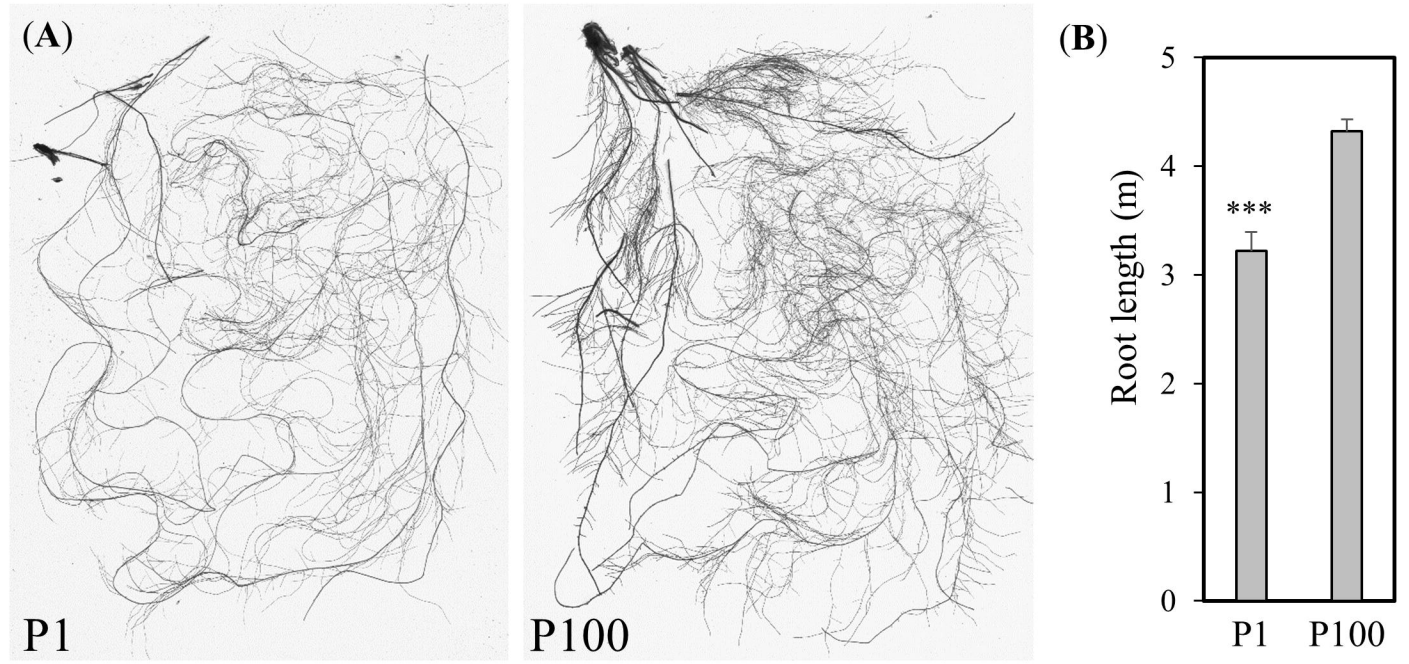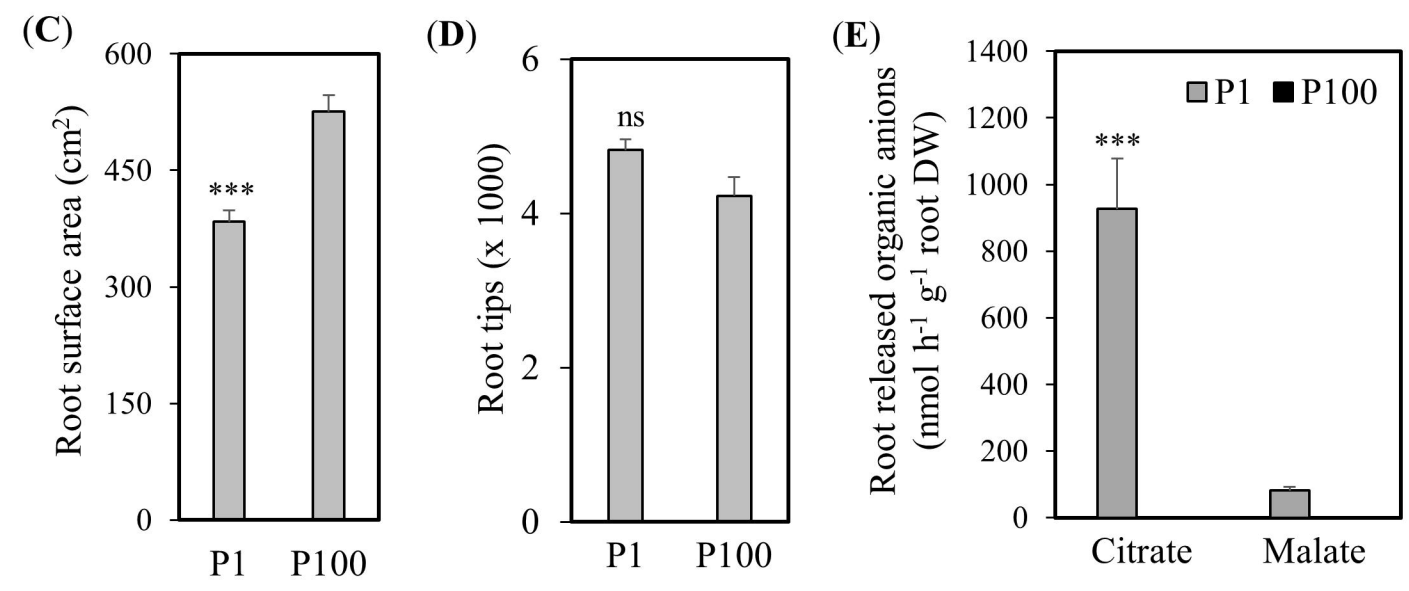

Wang *et al.*, Fig.2



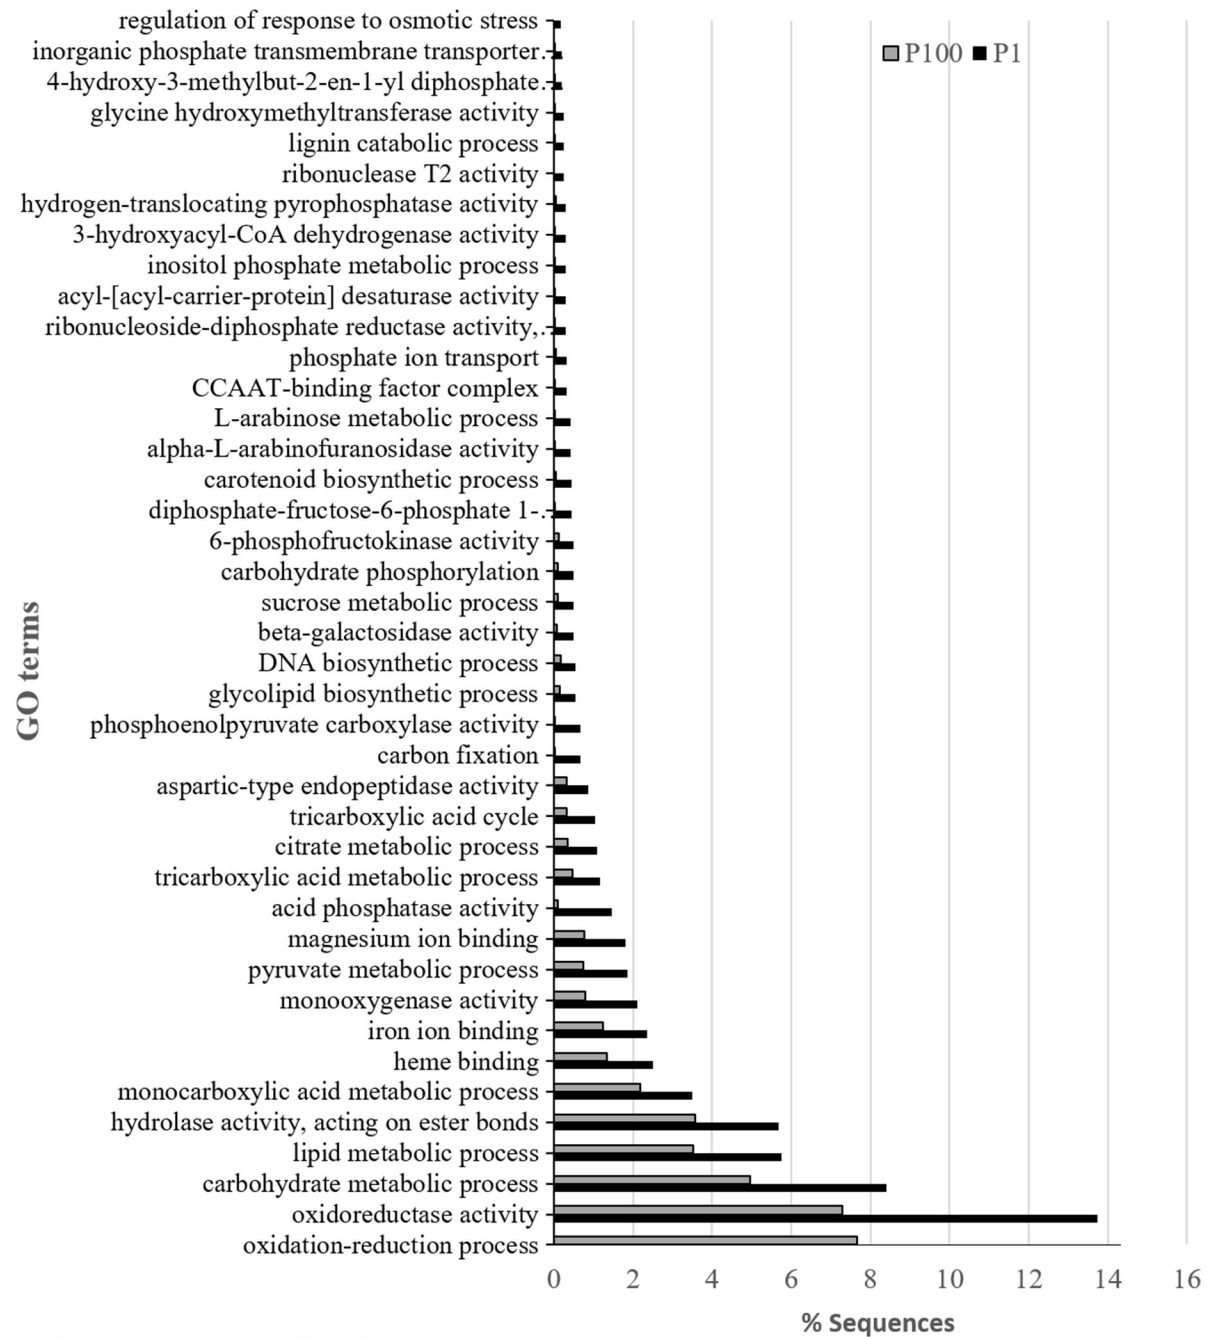

Wang *et al.*, Fig.3

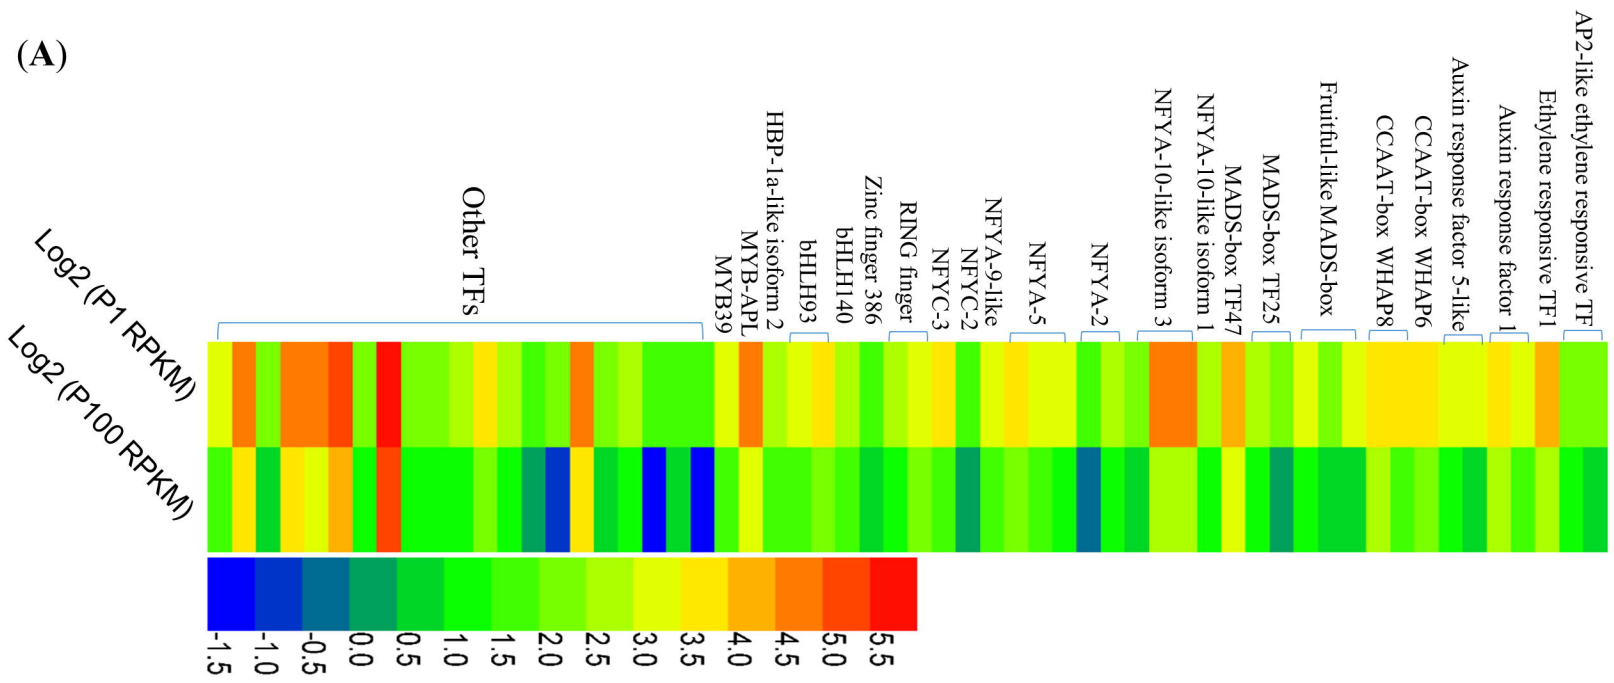

Wang *et al.*, Fig.4A

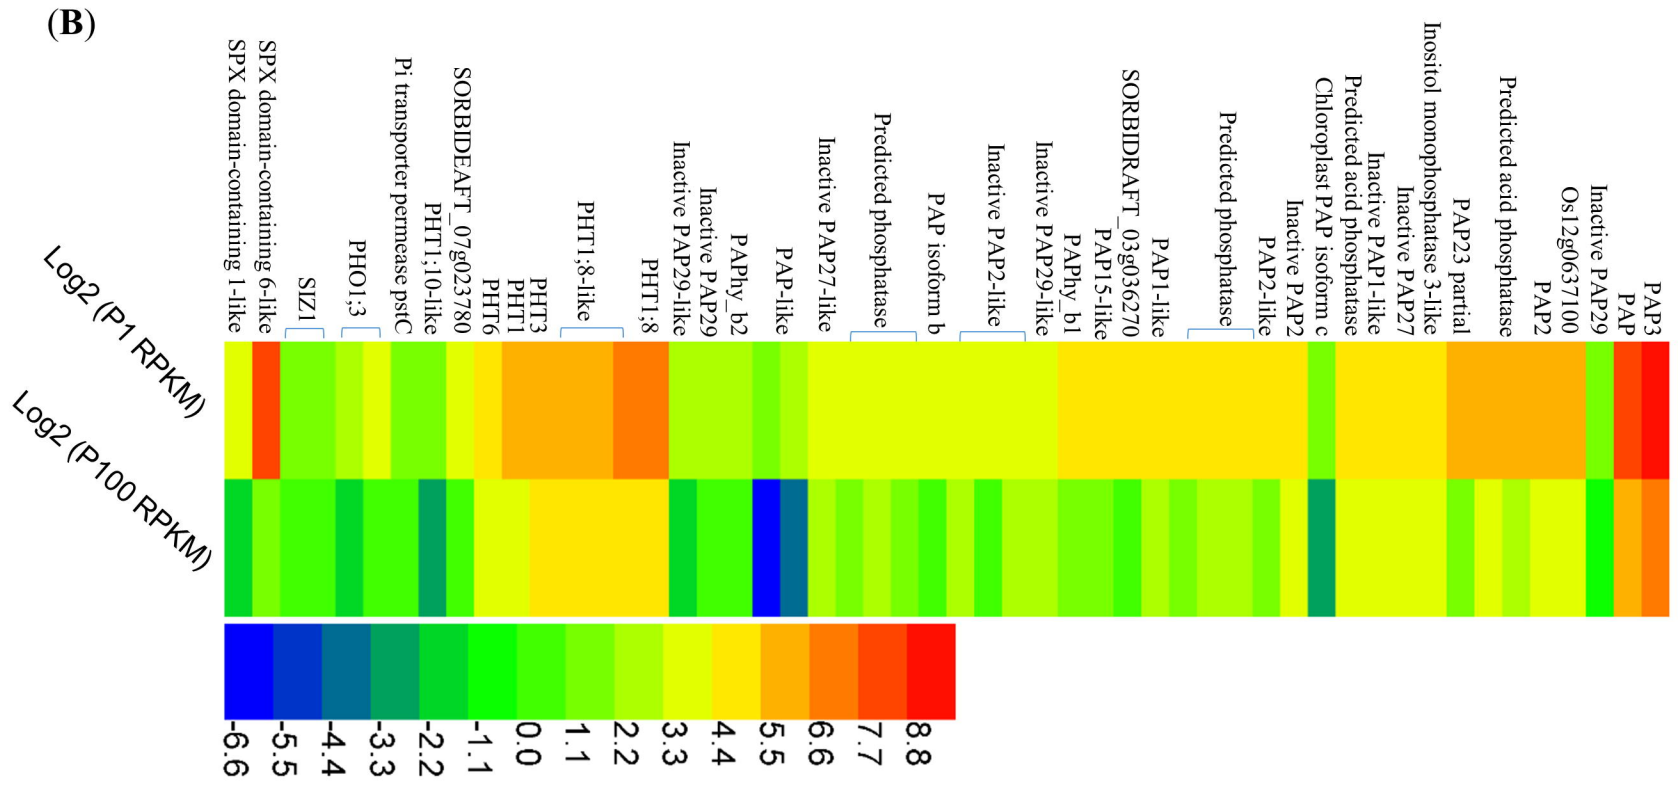

Wang *et al.*, Fig.4B

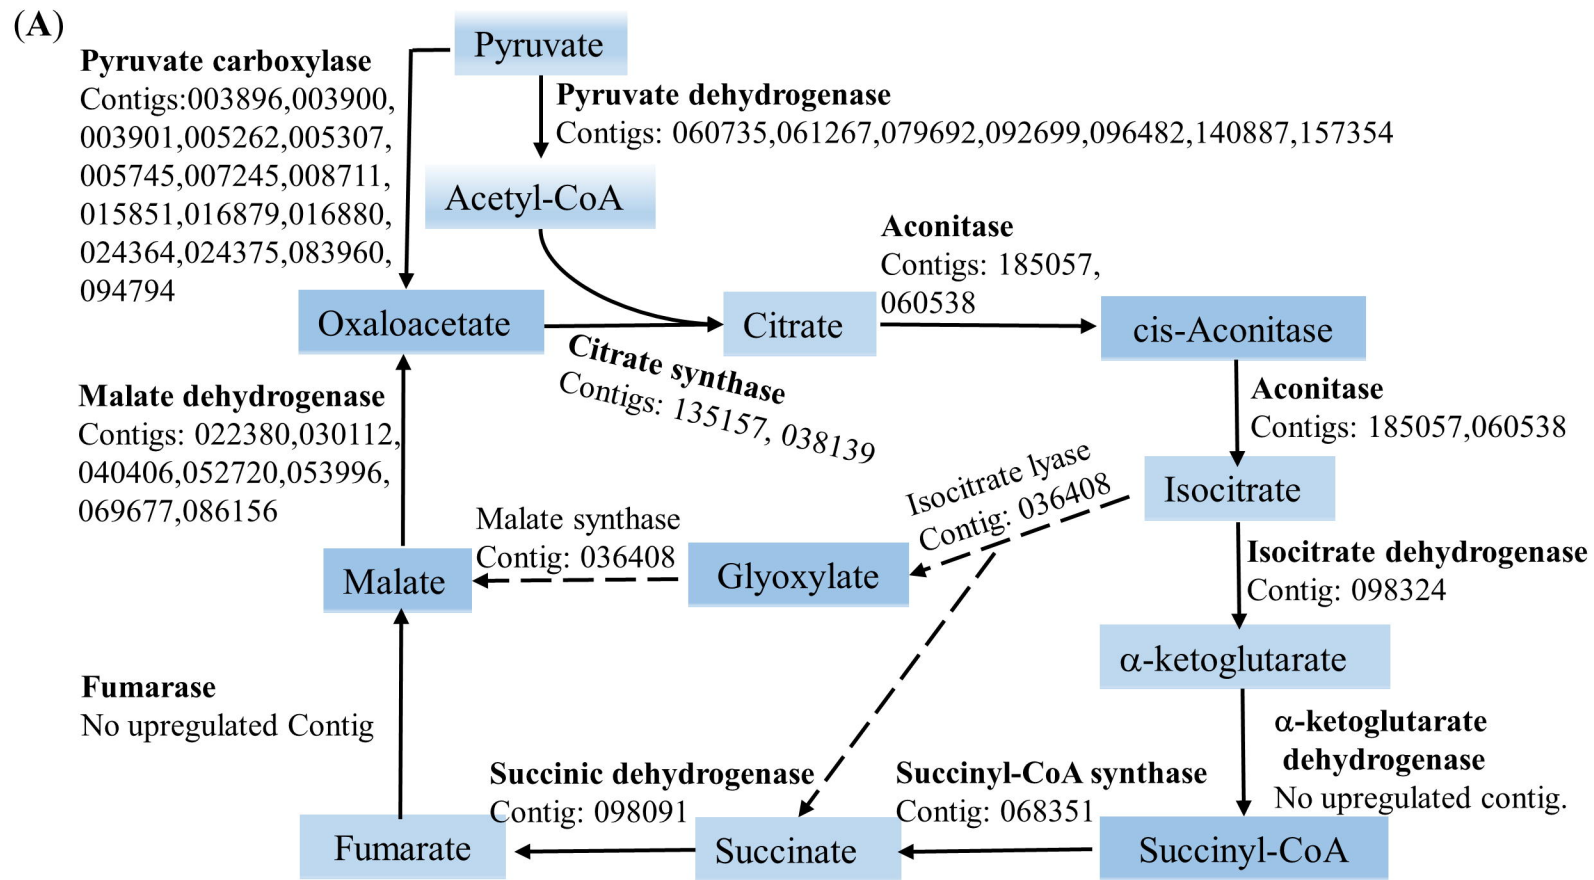

Wang *et al.*, Fig. 5A

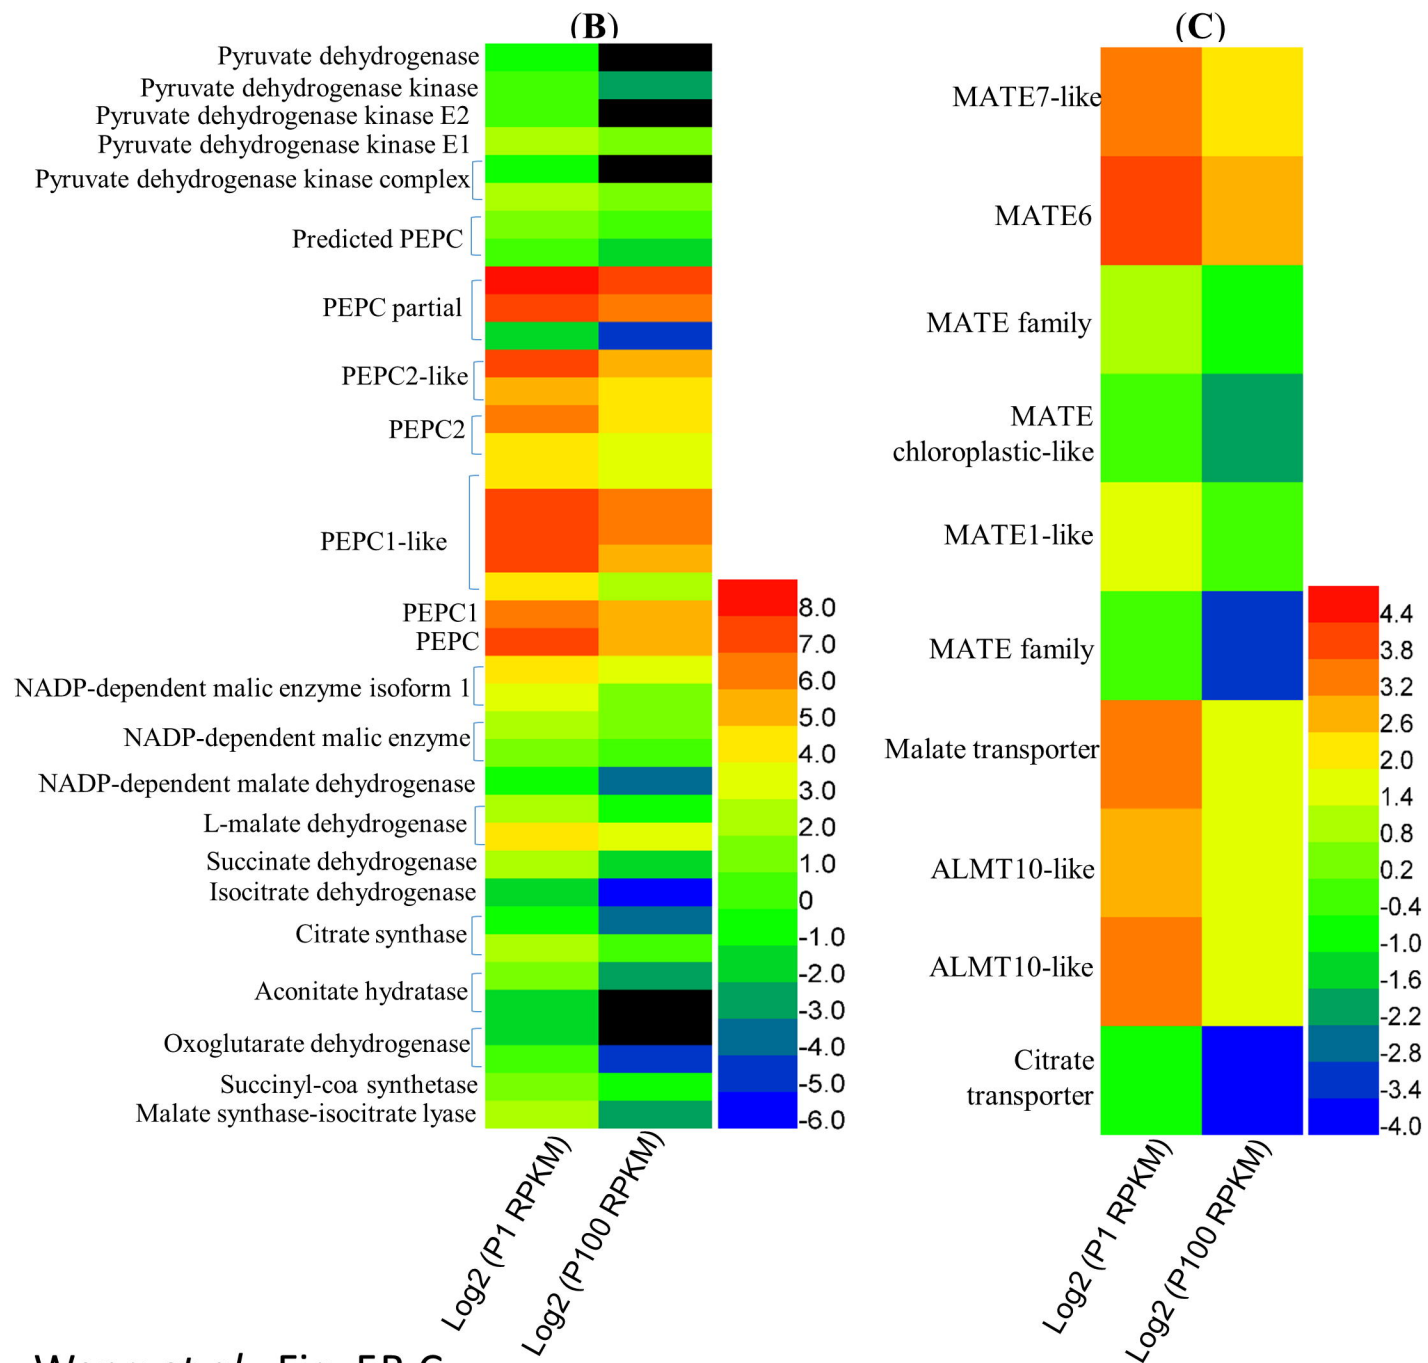

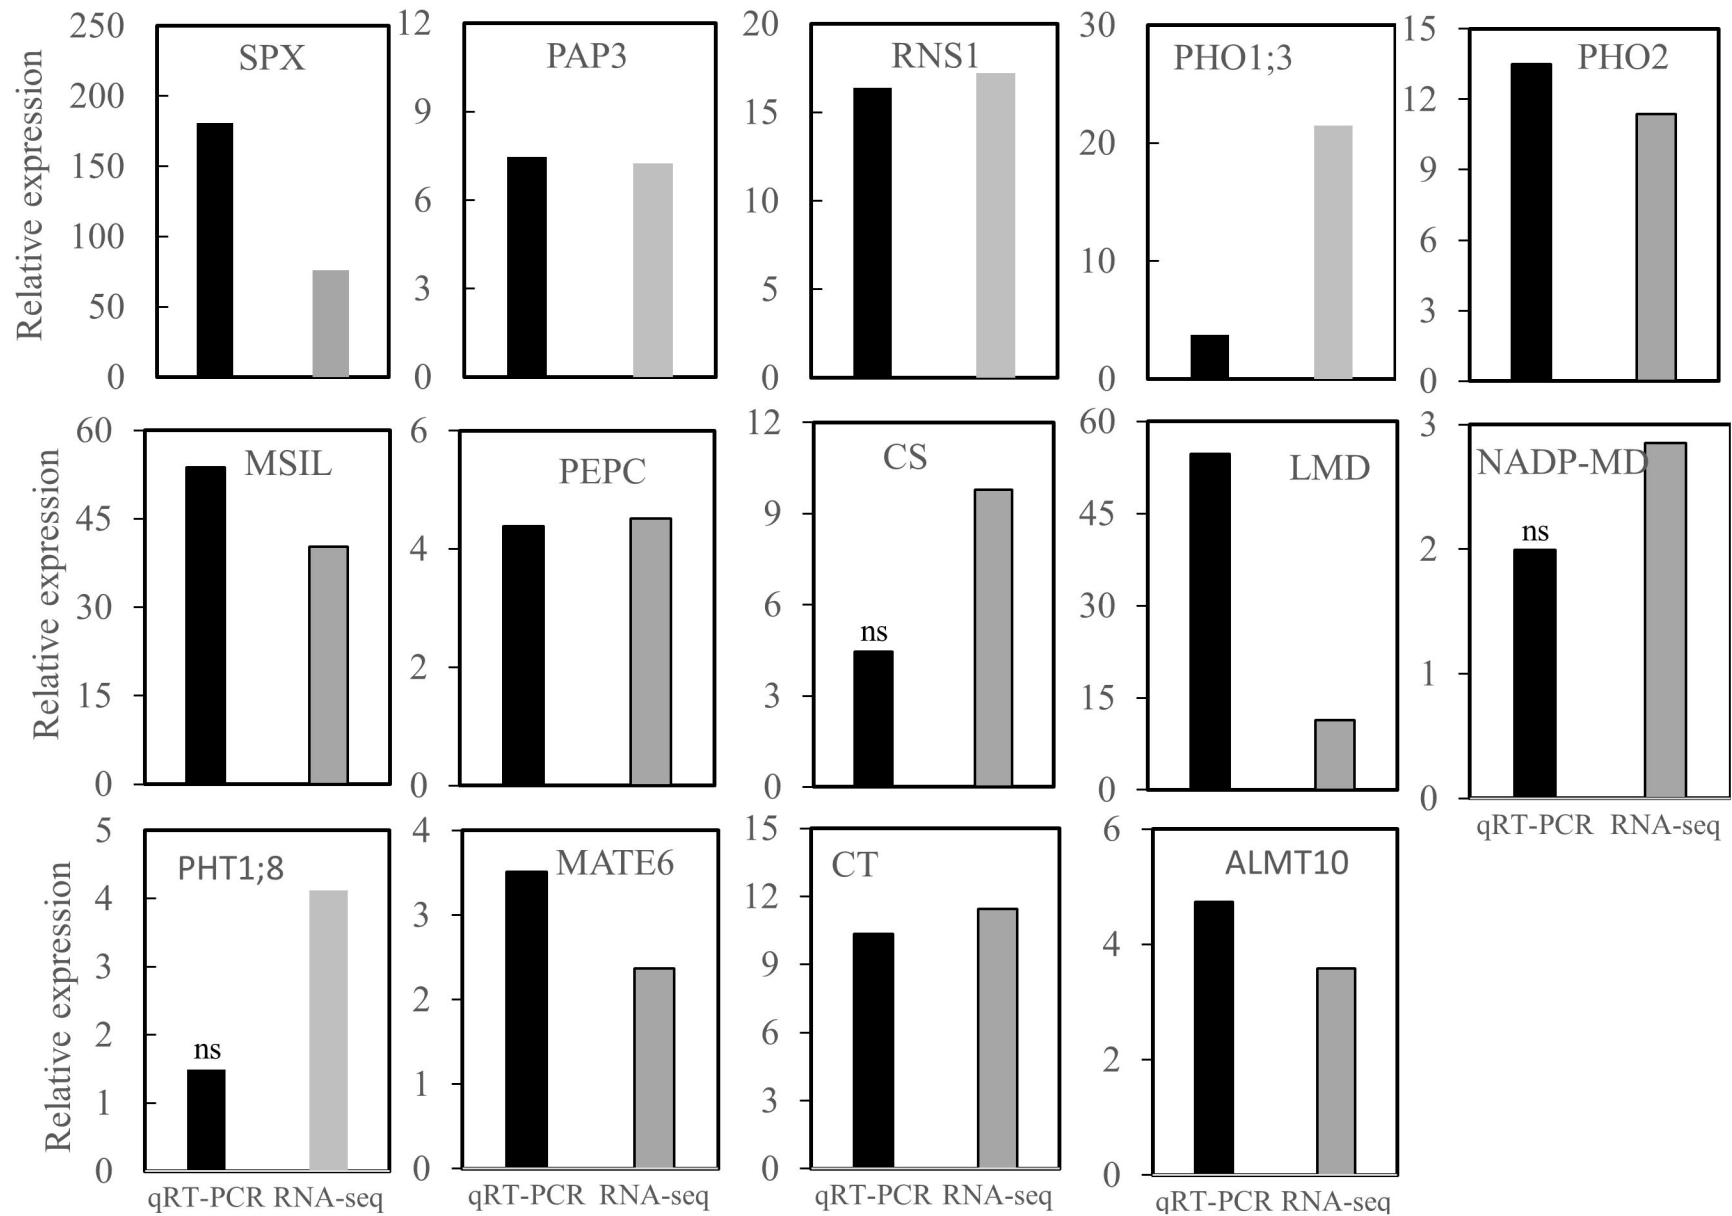

Wang *et al.*, Fig.6

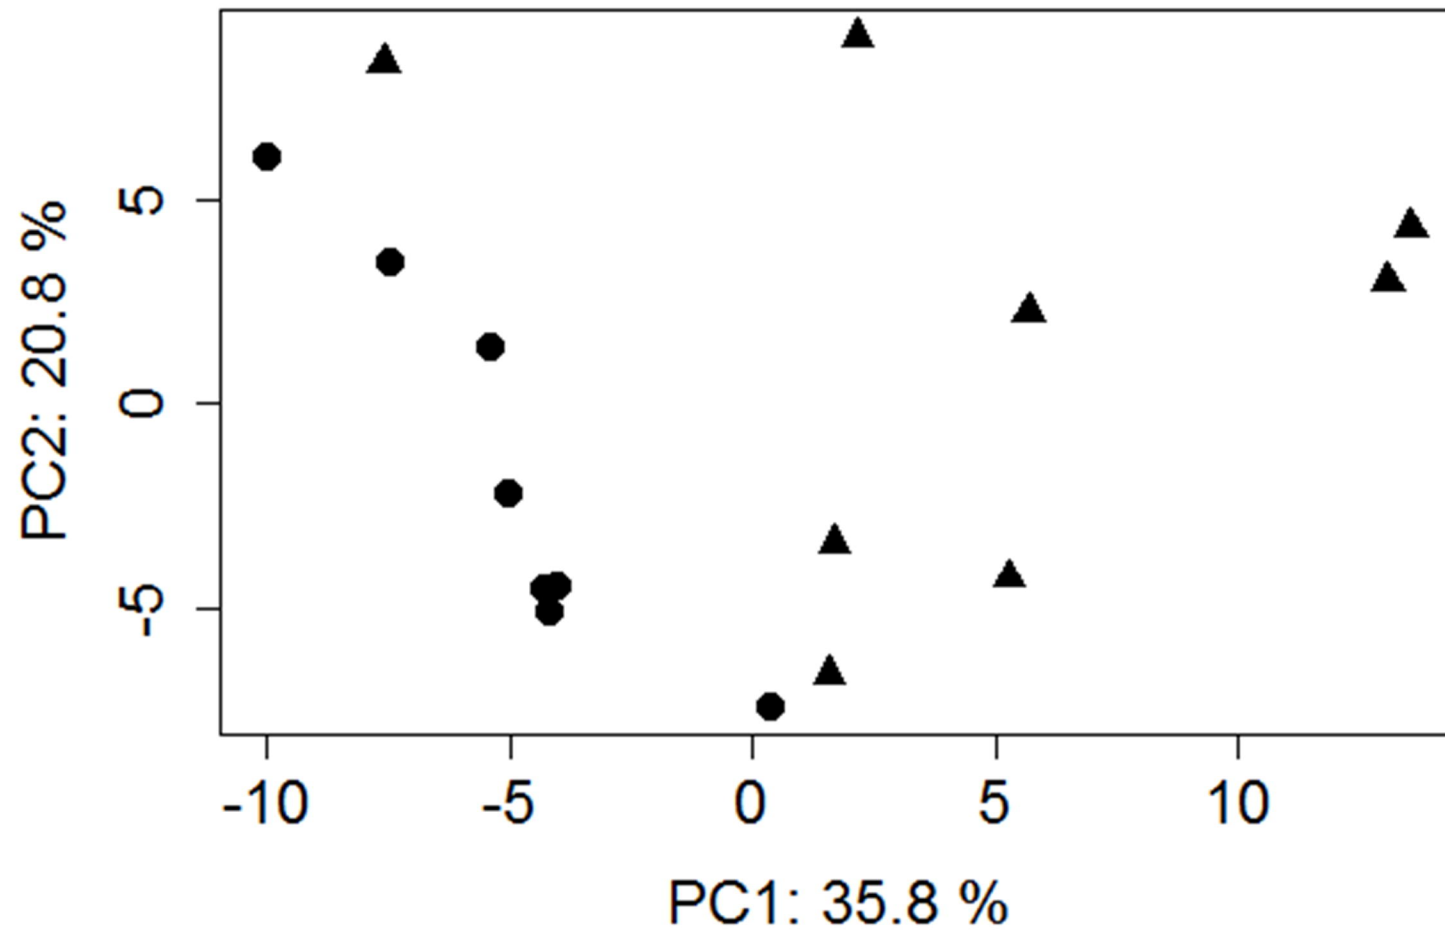

Wang *et al.*, Fig.7
